# Supplementary material
Source: PubMed Central journal article supplement (PMC10763522)
Supplement: science.abo3627_sm.pdf [file science.abo3627_sm.pdf]

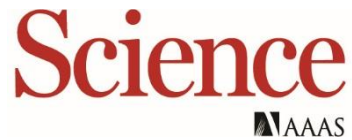

## Supplementary Materials for

### **Inborn errors of OAS–RNase L in SARS-CoV-2–related multisystem inflammatory syndrome in children**

Danyel Lee *et al.*

Corresponding author: Shen-Ying Zhang, shzh289@rockefeller.edu

*Science* **379**, eabo3627 (2023)  
DOI: 10.1126/science.abo3627

#### **The PDF file includes:**

Materials and Methods  
Figs. S1 to S9  
Tables S1 to S3  
References

#### **Other Supplementary Material for this manuscript includes the following:**

MDAR Reproducibility Checklist  
Data S1 and S2

## Materials and Methods

### Whole-exome and whole-genome sequencing

Genomic DNA was extracted from whole blood. Whole-exome sequencing (WES) or whole-genome sequencing (WGS) was performed at several sequencing centers, including the Genomics Core Facility of the Imagine Institute (Paris, France), the Yale Center for Genome Analysis (USA), the New-York Genome Center (NY, USA), the American Genome Center (TAGC, USUHS, Bethesda, USA), and the Genomics Division-ITER of the Canarian Health System sequencing hub (Canary Islands, Spain). For WES, libraries were prepared with the TruSeq DNA Sample Prep Kit (Illumina), the Twist Bioscience kit (Twist Human Core Exome Kit), the xGen Exome Research Panel from Integrated DNA Technologies (IDT xGen), the Agilent SureSelect V6 kit, the Agilent SureSelect V7 kit, the Agilent SureSelect Human All Exon 50 Mb kit, the SeqCap EZ MedExome kit from Roche, the SeqCap EZ Human Exome Kit v3.0 from Roche, or the Nextera Flex for Enrichment-Exome kit (Illumina). Massively parallel sequencing was performed on a HiSeq 2000-4000 or NovaSeq6000 system (Illumina). The sequences were analyzed with the Genome Analysis Software Kit (GATK) (version 3.4-46 or 4) best-practice pipeline for WES data (92). We aligned the reads obtained with the human reference genome (hg19), using the maximum exact matches algorithm in the Burrows–Wheeler aligner (BWA) (93). PCR duplicates were removed with Picard tools (picard.sourceforge.net). The GATK base quality score recalibrator was applied to correct sequencing artifacts. Genotyping was performed with GATK GenotypeGVCFs in the interval intersecting all the capture kits  $\pm 50$  bp. Sample genotypes with a coverage  $< 8X$ , a genotype quality (GQ)  $< 20$ , or a proportion of reads for the least covered allele (reference or variant allele) over the total number of reads covering the position (minor read ratio, MRR)  $< 20\%$  were filtered out. We filtered out variant sites that (i) fell in low-complexity or decoy regions, (ii) were multiallelic, with more than four alleles, (iii) had more than 10% missing genotypes in our cohort, and (iv) spanned more than 15 nucleotides. Variant effects were predicted with the Ensembl Variant Effect Predictor (VEP)(94) and Loss-Of-Function Transcript Effect Estimator (LOFTEE) Plugin, with the Ensembl GRCh37.75 reference database, retaining the most deleterious annotation obtained from the Ensembl protein-coding transcripts overlapping the RefSeq transcripts. Predicted loss-of-function variants flagged as being of low confidence by LOFTEE were excluded, together with variants curated as “not LoF” in gnomAD v2.1.

### In vitro peripheral blood mononuclear cell stimulation with SARS-CoV-2

We performed single-cell RNAseq (scRNAseq) on SARS-CoV-2- and mock-stimulated PBMCs sampled from four individuals with inborn errors of the OAS–RNaseL pathway (P1 with OAS1 deficiency, P2 and P3 with OAS2 deficiency, P5 with RNase L deficiency), three individuals with inborn errors of type I IFN immunity (one TLR7-deficient patient (7), one IRF9-deficient patient (95), one IFNAR1-deficient patient (57)), and eight healthy donors: one pediatric control and one adult control with a history of past asymptomatic SARS-CoV-2 infection, two pediatric controls and four adult controls with no history of prior SARS-CoV-2 infection. Cryopreserved PBMCs were thawed in a 37°C water bath, centrifuged at 300g for 10 min at room temperature, and resuspended at a density of  $2 \times 10^6$  cells/ml in 25 cm<sup>2</sup> flasks. Cells were left to rest overnight (i.e., approximately 14 hours) at 37°C in RPMI medium supplemented with 10% heat-inactivated fetal bovine serum (R10). The following morning, the PBMCs were washed and resuspended at a density of  $3.3 \times 10^6$  cells/ml in R10. Then, 120 µl of suspension from each sample, containing  $4 \times 10^5$  cells, was plated in a 96-well untreated plate for each of the three conditions. We added 80 µl of R10 (mock) or SARS-CoV-2 ( $4 \times 10^5$  focus-forming units diluted in R10) to the cells to achieve a MOI of 1 and an optimal density of PBMCs at  $2 \times 10^6$  cells/ml. The cells were incubated at 37°C for 6 hours, in a biosafety level 3 (BSL-3) facility at Institut Pasteur, Paris. The plates were centrifuged at 300g for 10 min. Samples were then resuspended in phosphate-buffered saline (PBS) supplemented with 0.04% bovine serum albumin (BSA) and multiplexed in eight pools according to a pre-established design, to control for effects related to processing and sequencing batches. The cells in each pool were counted with a Cell Countess II automated cell counter, and cell density was adjusted to 1000 viable cells/µl in PBS supplemented with 0.04% BSA.

### ScRNAseq library preparation and sequencing of PBMCs stimulated in vitro with SARS-CoV-2

ScRNA-sequencing cDNA libraries were generated with a Chromium Controller (10X Genomics, Pleasanton, CA) according to the manufacturer's instructions for the Chromium Single Cell 3' Library and Gel Bead Kits (v3). Library quality and concentration were assessed with an Agilent 2100 Bioanalyzer and a Qubit fluorometer. The final products were sent to Macrogen Inc. for high-throughput sequencing on a HiSeqX platform (Illumina Inc.).

## Data processing for scRNA-seq of PBMCs stimulated with SARS-CoV-2

Paired-end sequencing reads from each of the eight scRNA-seq cDNA libraries were independently mapped onto the concatenated human (GRCh38) and SARS-CoV-2 genome sequences with *CellRanger* (v4.0.0). Cell-containing droplets were assigned to their sample of origin with *Demuxlet* (v0.1), making use of the genotyping data available for every individual. We loaded feature-barcode matrices for all cell-containing droplets identified as singlets by *Demuxlet* in each scRNA-seq library onto a *SingleCellExperiment* (v1.14.1) object. Barcodes associated with low-quality or dying cells were removed from the data set by a hard threshold-based filtering strategy with three metrics: within each sequencing library, cells with fewer than 1500 total counts, 500 detected features, or with a mitochondrial gene content exceeding 20% were removed from the analysis.

We then log-normalized raw UMI counts with a unit pseudocount and library size factors (i.e., the number of reads associated with each barcode) were calculated with *quickClusters* and *computeSumFactors* from the *scrn* package (v1.20.1). We then calculated the mean and variance of log-counts for each gene and broke the variance down into a biological and a technical component with the *fitTrendPoisson* and *modelGeneVarByPoisson* functions of *scrn*. Briefly, this approach assumes that technical noise is Poisson-distributed and simulates Poisson-distributed data to derive the mean-variance relationship expected in the absence of biological variation. The excess variance relative to the null hypothesis is then considered to be the biological variance. We retained only those genes for which the biological variance component was  $>0$  with a false discovery rate (FDR) below 1%. We used this filtered feature set and the technical variance component modeled from the data to perform principal component analysis (PCA), discarding later principal components (PCs), which probably capture technical noise, with *denoisePCA* in *scrn*.

We found that doublets (i.e., barcodes assigned to cells from different individuals captured in the same droplet) were likely to be nearest neighbors (NN) when projected onto a reduced-dimension space. We therefore used a  $k$ -NN approach to weed out cryptic doublets (i.e., barcodes assigned for different cells from the same individual captured in the same doublet). Barcodes assigned as

singlets by Demuxlet but with more than 5/25 doublet NNs in the transcriptomic PC space were reassigned as doublets and excluded from further analyses.

Following this first round of preprocessing, we performed a second round of UMI count normalization, feature selection, and dimensionality reduction on the cleaned data, to prevent bias due to the presence of low-quality cells and cryptic doublets. We homogenized sequencing depth between batches (i.e., sequencing libraries) by using *multiBatchNorm* from *batchelor* (v1.8.1) to scale library size factors according to the ratio of mean counts between batches. Differences in mean-variance trends between batches were taken into account by applying *modelGeneVarByPoisson* separately for each sequencing library, and then combining the results for all batches with *combineVar* from *scraper*. We then bound all eight separate preprocessed feature-barcode matrices into a single merged *SingleCellExperiment* object, log-normalized UMI counts with the scaled size factors, and selected genes with a mean log-expression over 0.01 or a biological variance compartment over 0.001. Based on this set of highly variable genes and the variance breakdown, we performed PCA on the whole data set with *denoisePCA* and corrected PCs using Harmony (v0.1.0) to adjust for library effects.

#### Data analysis for scRNAseq of PBMCs stimulated with SARS-CoV-2

We performed cluster-based cell-type identification in each set of conditions according to a four-step procedure. We first performed low-resolution (res. parameter=0.8) shared nearest neighbors graph-based ( $k=25$ ) clustering with *FindClusters* from *Seurat* (v4.1.1) with assignment to one of three meta-clusters (i.e., myeloid, B lymphoid, and T/NK lymphoid) based on the transcriptional profiles of canonical markers (e.g., *CD3E-F*, *CD14*, *FCGR3A*, *MS4A1*). We then performed a second round of clustering at higher resolution (res. parameter=3) within each meta-cluster and set of conditions. We systematically tested for differential expression between each cluster and the other clusters in the same meta-cluster and conditions to define unbiased markers ( $|\log_2FC| > 0$ ,  $FDR < 0.01$ ) for each cluster. We then used these genes (both upregulated and downregulated) to assign each cluster manually to one of six different cell types, which we collapsed into five major immune lineages. Thus, by calling cell types on the basis of high-resolution, homogeneous clusters assigned independently for each lineage and set of conditions, we were able to preserve much of the diversity in our data set, while avoiding potentially confusing effects of stimulation conditions.

However, we did observe clusters with marker profiles suggestive of mixed identity. Some of these profiles were consistent with mixtures of biologically similar cell types (e.g., *CD3E*, *CD8A*, *NKG7*, and *CD16* for a mixture of cytotoxic CD8<sup>+</sup> T and NK cells), whereas others (fewer in number) were considered inconsistent (e.g., *CD3E*, *CD19*) and were discarded. For the resolution of consistent mixtures, the fourth and final step of our procedure was linear discriminant analysis. For any cluster of mixed identity AB, we built a training data set from 2000 observations sampled from the set of cells called as A or B, preserving their respective frequencies in the whole data set. We then used a model trained on these data to predict identities in the mixed cluster.

For the pseudobulk analysis, pseudobulk estimation, normalization, and batch correction were performed as follows: individual variation in gene expression was quantified at two different resolutions (five immune lineages and six cell types). We aggregated raw UMI counts from all high-quality single-cell transcriptomes ( $n=46,157$ ) into bulk expression estimates by summing gene expression values across all cells assigned to the same immune lineage/cell type and sample (i.e., individual and conditions) with the *aggregateAcrossCells* function from *scuttle*. We then normalized the raw aggregated UMI counts by library size, generating 160 lineage-wise (16 donors $\times$ 2 conditions $\times$ 5 lineages) and 192 cell type-wise (32 samples $\times$ 6 cell types) pseudobulk counts-per-million (CPM) values for all 14,557 genes in our data set. CPM values were then log<sub>2</sub>-transformed, with an offset of 1 to avoid values of infinity and to stabilize variation for genes with low levels of expression. Genes with a mean CPM below 1 across all conditions and immune lineages/cell types were considered to be not expressed and were discarded from further analyses. Unwanted experimental variation was minimized by using the *lmer* function from the *lme4* package to fit a linear model of the form  $\log_2(CPM_i+1)=\alpha+IID_i+LIB_i+\varepsilon_i$  to each set of conditions and immune lineage/cell type, where  $CPM_i$  is the expression in sample  $i$  (i.e., one replicate of a given individual and set of experimental conditions),  $\alpha$  is the intercept,  $IID_i\sim N(0,\sigma^2_{IND})$  captures the effect of individual  $i$  on gene expression, and  $LIB_i\sim N(0,\sigma^2_{LIB})$  captures the effect of 10X Genomics library preparation. We then subtracted the estimated value for library effects (provided by the *ranef* function) from the transformed CPMs for each sample, to obtain batch-corrected CPM values. Finally, we averaged the batch-corrected CPM values obtained across different replicates for the same individual and set of conditions to obtain final estimates of gene expression. We define as differentially expressed genes those genes with an absolute log<sub>2</sub>-fold change (FC) in expression upon SARS-CoV-2 stimulation greater than 0.2 at a false discovery rate (FDR) of 1%

( $|\log_2\text{FC}(\text{COV})| > 0.2$ ,  $\text{FDR} < 0.01$ ). We assessed the effect of OAS–RNase L deficiency on the transcriptional response to SARS-CoV-2 stimulation by calculating a  $t$  statistic for each gene in each cell type with the FC estimated by our linear model in the OAS–RNase L-deficient (OAS–RNase L MT) and control (Ctrls) contexts, respectively, and the standard errors of the corresponding estimators. We considered genes to be significantly affected by OAS–RNase L deficiency if  $|t| \geq 1.96$ .

We modeled the effects of immunodeficiency on gene expression and the response to stimuli as follows: we estimated the effects of OAS–RNaseL/IFN pathway deficiencies on gene expression in each individual ( $n=16$ ) and set of conditions by constructing, for each gene, lineage (i.e., myeloid, B,  $\text{CD4}^+$  T,  $\text{CD8}^+$  T or NK cells) and set of conditions (i.e., SARS-CoV-2–stimulated or mock-stimulated) a separate linear model of the form  $Y_{i,j,k,l} = \alpha + \beta^{OAS} \cdot I^{OAS}_i + \beta^{IFN} \cdot I^{IFN}_i + Z_i^T \cdot \gamma + \varepsilon_i$ . In this model,  $Y_{i,j,k,l}$  is the expression (log-normalized counts) of gene  $j$  in individual  $i$ 's cells from lineage  $k$  in condition  $l$ .  $I^{OAS}_i$  and  $I^{IFN}_i$  are dummy variables equal to 1 for OAS–RNaseL- and IFN-deficient individuals, respectively, and equal to 0 otherwise. The set of core covariates of individual  $i$ , including age, sex, COVID-19 status, and cellular mortality (i.e., proportion of dying cells in each thawed vial, as a proxy for sample quality) are encoded in  $Z_i$ . In addition,  $\varepsilon_i$  corresponds to the normally distributed residuals, and  $\alpha$ ,  $\beta^{OAS}$ ,  $\beta^{IFN}$ ,  $\gamma$  are the fitted parameters of the models. In particular,  $\alpha$  is the intercept,  $\beta^{OAS}$  ( $\beta^{IFN}$ ) is the  $\log_2$  fold-change difference in expression between groups (OAS–RNase L-deficient, IFN-deficient, and control individuals), and  $\gamma$  captures the effects of the set of core covariates on gene expression.

We reasoned that differences in the variance of gene expression between immune deficiency statuses would inflate the number of false positives. We therefore used the *vcovHC* function from *sandwich* (v2.5-1) with the `type='HC3'` option to calculate sandwich estimators of variance robust to residual heteroskedasticity and estimated the coefficients and their standard error with the *coefest* function of *lmtest* (v0.9-40). We estimated the effect of OAS–RNase L or IFN pathway deficiencies on the response to stimulation of each gene in each sample by fitting the linear model described above, but with the gene's  $\log_2$ -fold change in expression upon stimulation as the response variable. Due to the small sample size, genes with a nominal  $p < 1\%$  and  $|\beta| > 0.2$  were considered to be differentially expressed/responding.

scRNAseq on PBMCs obtained from P5 during the acute and convalescent phases of MIS-C

Cryopreserved PBMCs from P5 (aged 4 years) sampled during the acute (9 days after MIS-C onset) and convalescent (~1 month after onset) phases were analyzed, together with cells from one healthy adult and two pediatric controls. The cells were subjected to scRNAseq. Briefly, thawed cells were washed with medium and filtered through a MACS SmartStrainer with 70- $\mu$ m pores (Miltenyi Biotec, Cat: 130-098-462) to remove large debris. Cells were then washed three times with PBS + 0.5% FBS and finally filtered again with a Falcon 40- $\mu$ m-mesh Cell Strainer (Corning, Cat: 352340) before capture with the 10X Genomics Chromium chip. Libraries were prepared with the Chromium Single-Cell 3' Reagent Kit (v3 Chemistry) and sequenced with an Illumina NovaSeq 6000 sequencer (S1 flowcell). Sequences were preprocessed with Cell Ranger v6.1.2 on the 10X Genomics Cloud Analysis platform (<https://www.10xgenomics.com/products/cloud-analysis>). Approximately 11,000–16,000 cells were captured per sample, with a mean of at least ~22,000 reads per cell.

The data generated during this study were analyzed in an integrative manner with historical controls from the laboratory (one pediatric and seven adult controls), publicly available control PBMC datasets downloaded from the 10X Genomics web portal (<https://support.10xgenomics.com/single-cell-gene-expression/datasets>), and a previously published dataset for patients with acute SARS-CoV-2 infection and MIS-C (GEO accession: GSE167029). In addition, two other previously published sets of scRNAseq data for pediatric healthy controls and children with acute SARS-CoV-2 infection or MIS-C (GSE166489; Zenodo DOI: <https://doi.org/10.5281/zenodo.5524378>) were used for an independent cohort analysis. Data were manually curated according to the percentage of mitochondrial genes and the numbers of genes and transcripts detected. Curated datasets were integrated with Harmony (96). Two sequential graph-based clustering analyses were performed. The second round of clustering focused on memory and effector T cells and NK cells to achieve the highest resolution of cellular subsets. Clusters were identified manually with the SingleR pipeline (97) guided by MonacoImmuneData (98). The TotalSeq datasets derived from 10X also provided information about the identity of each cluster. Pseudobulk differential expression analysis was conducted with DESeq2 (99), with the exclusion of all public datasets. GSEA was conducted with the fgsea package by projecting the ranking of the fold-change in expression onto the Hallmark genesets



(71). Intercellular communication analysis was conducted with CellChat (74). All analyses were performed in R v4 (100).

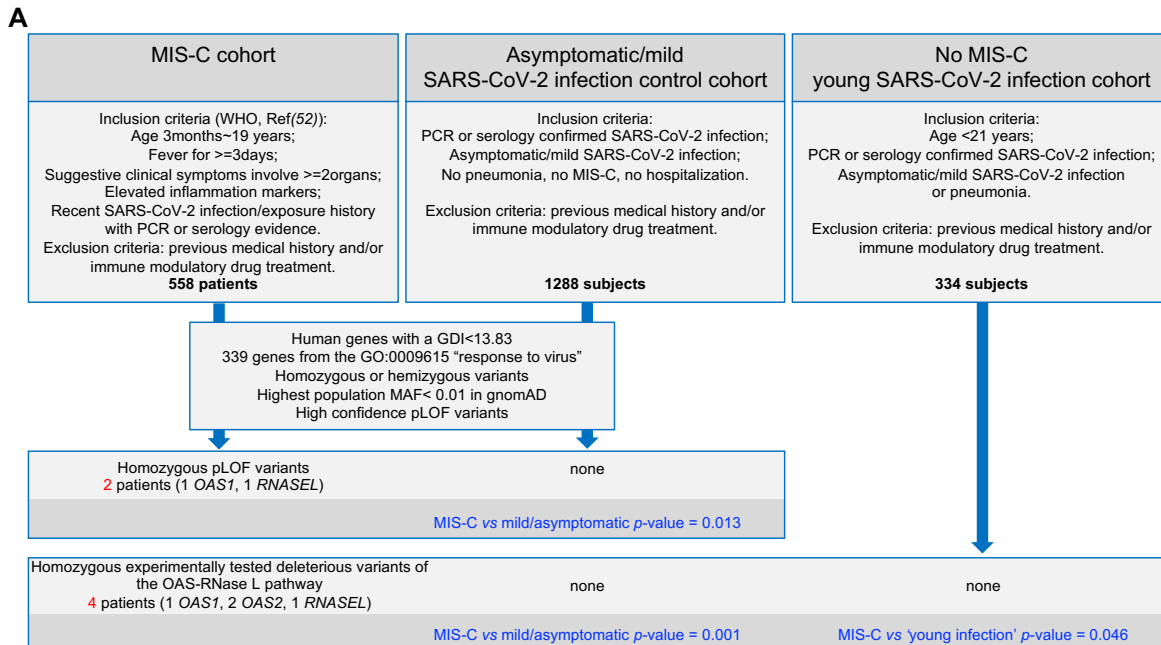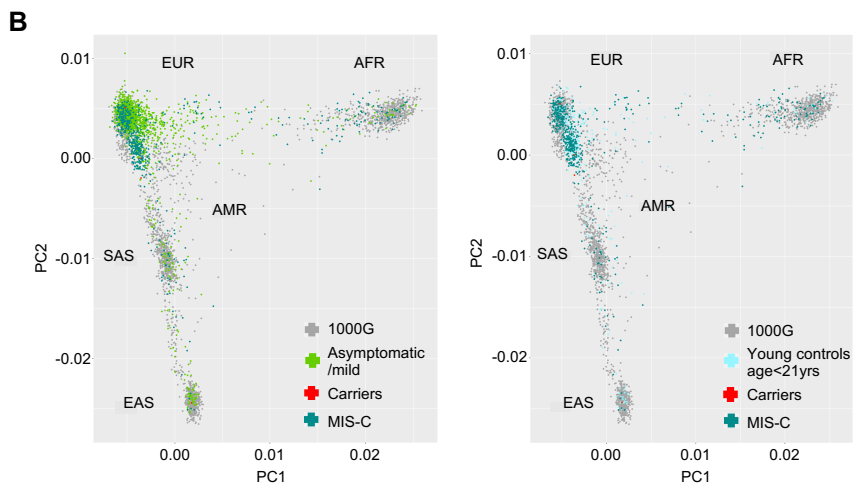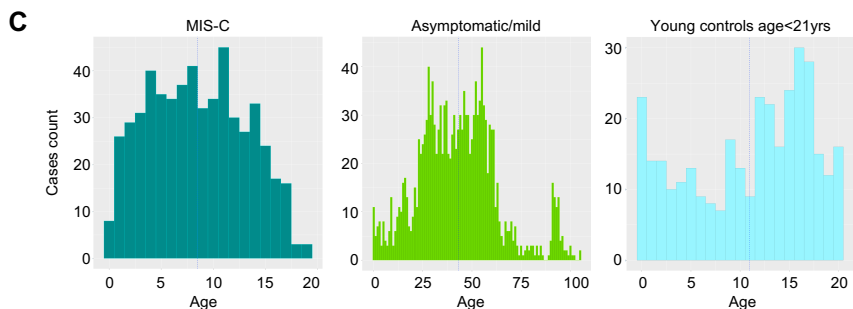

**Fig. S1. Enrichment in homozygous variants of the OAS–RNase L pathway in MIS-C patients**

(A) Schematic overview of the genetic approaches leading to the discovery of an enrichment in homozygous deleterious variants of the OAS–RNase L pathway in MIS-C patients. (B) Principal component analysis (PCA) of ethnic heterogeneity for the MIS-C cohort, 1288 SARS-CoV-2–infected controls, and a control cohort of 334 young patients with asymptomatic/mild infection (175 patients) or COVID-19 pneumonia (159 patients). Data from the 1000 Genomes project are shown as ethnicity controls. (C) Age distribution of the MIS-C cohort, 1288 SARS-CoV-2–infected controls, and a control cohort of 334 young patients with asymptomatic/mild infection (175 patients) or COVID-19 pneumonia (159 patients).

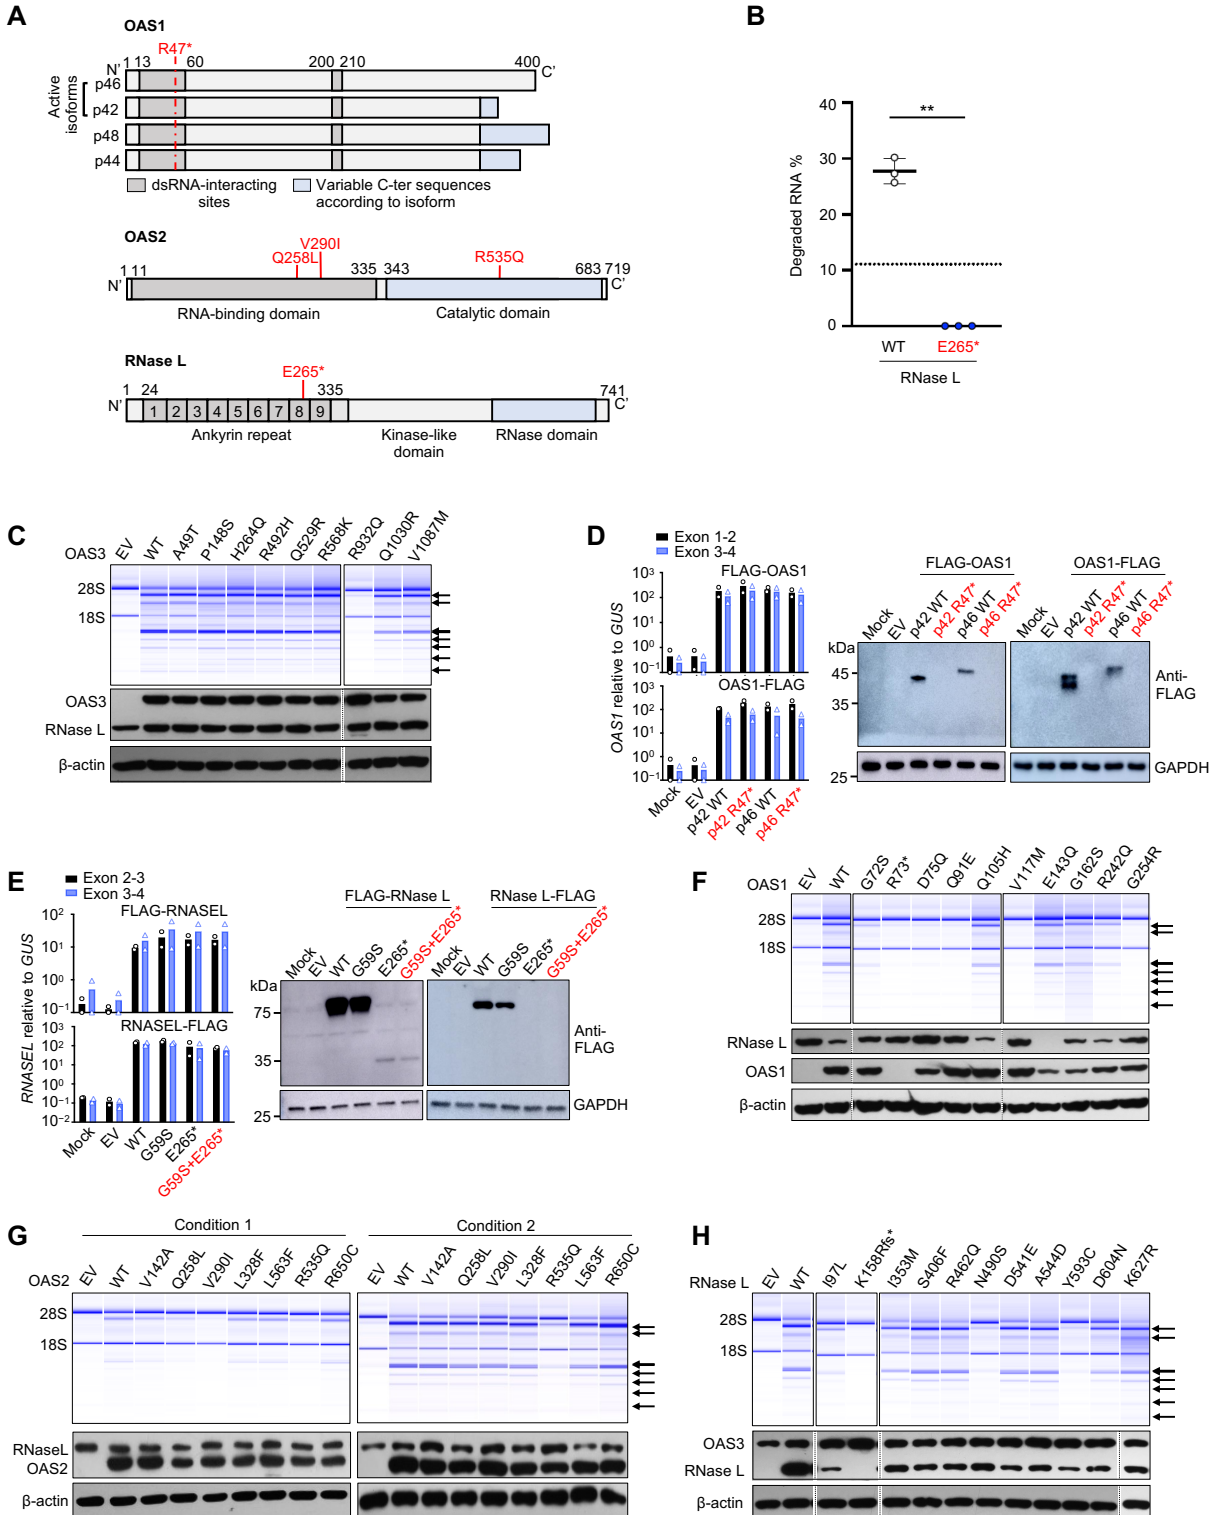

**Fig. S2. Enrichment in homozygous deleterious *OAS1*, *OAS2*, and *RNASEL* variants in MIS-C patients**

(A) Schematic diagram of the structure of the OAS1, OAS2 and RNase L proteins and the location of deleterious mutations specific to the MIS-C patients. (B) Semi-quantification of the levels of rRNA degradation by WT or mutant (MT) *RNASEL* cDNA. Area under the curve (AUC) of the major degraded rRNA species peak as a percentage of the total AUC for 28S and 18S rRNA. The data shown are means  $\pm$  SEM from three independent experiments with one technical replicate per experiment. Statistical tests were performed as described in the Methods.  $**P < 0.01$ . (C) Functional assays for WT and mutant OAS3. Variants potentially compound heterozygous in our MIS-C cohort were tested. Upper panels: RNase L-mediated cleavage of rRNA. Lower panels: immunoblots for the indicated proteins. (D and E) mRNA and protein levels for WT and MT OAS1 and RNase L in HEK293 cells following transient transfection with a plasmid encoding N-terminally or C-terminally Flag-tagged OAS1 (isoform p42 or p46) (D) or RNase L (E). (F to H) Functional assays for the various OAS1 (F), OAS2 (G), and RNase L (H) variants, and the corresponding WT gene products. Variants for which homozygotes are reported in gnomAD were tested. Upper panels: RNase L-mediated cleavage of rRNA. Lower panels: immunoblots for the indicated proteins. OAS2 variants (G) were tested under two different sets of conditions, as described in the Methods. The results shown in (C, F, and G) are representative of three independent experiments. The data points in (D and E) are means from two independent experiments with two technical replicates per experiment. EV: empty vector.

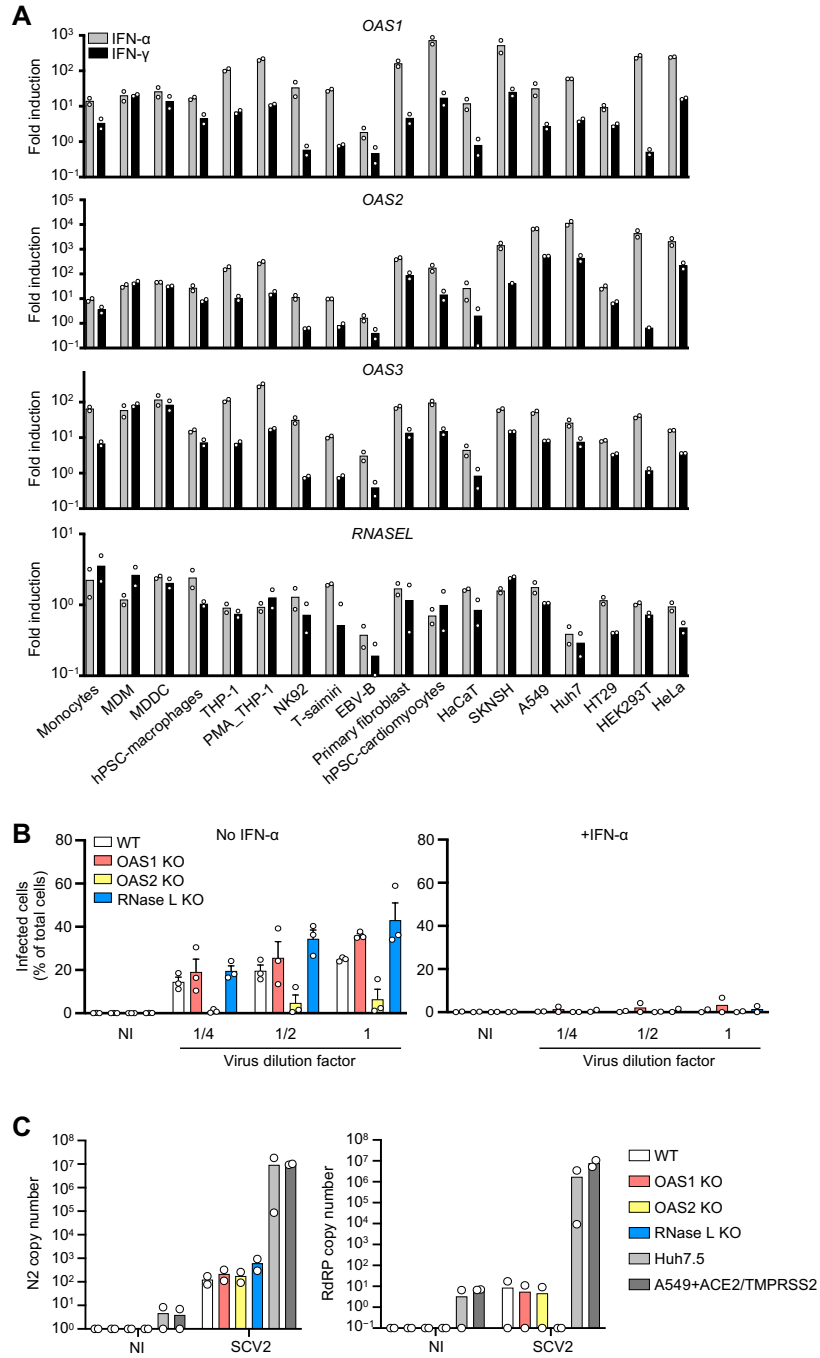

**Fig. S3. Expression pattern of the OAS–RNase L pathway genes and their role in SARS-CoV-2 restriction**

(A) *OAS1*, *OAS2*, *OAS3*, and *RNASEL* mRNA induction after 8 hours of stimulation with IFN- $\alpha$ 2b or IFN- $\gamma$ , as quantified by RT-qPCR. Each data point represents a technical duplicate. MDM: monocyte-derived macrophages, MDDC: monocyte-derived dendritic cells, hPSC: human pluripotent stem cells, PMA\_THP-1: PMA-primed THP-1 cells. (B) Percentage of cells positive for SARS-CoV-2, as determined by measuring the immunofluorescence of SARS-CoV-2 N-protein in OAS1 KO, OAS2 KO, RNase L KO, or parental (WT) A549 +ACE2/TMPRSS2 cells, 48 hours after infection with various dilutions of SARS-CoV-2. Dilution factors 1/4, 1/2 and 1 correspond to a MOI of 0.0002, 0.0005 and 0.001, respectively. NI, noninfected. The data shown are means  $\pm$  SEM from three independent experiments with three to six technical replicates per experiment. (C) SARS-CoV-2 N2 and RdRP RNA levels as measured by RT-qPCR in THP-1 cells, Huh7.5 cells, and A549+ACE2/TMPRSS2 cells infected with SARS-CoV-2 for 24 hours. The data points shown are biological replicates from one (A549+ACE2/TMPRSS2 cells) to two independent experiments (THP-1 cells and Huh7.5 cells).

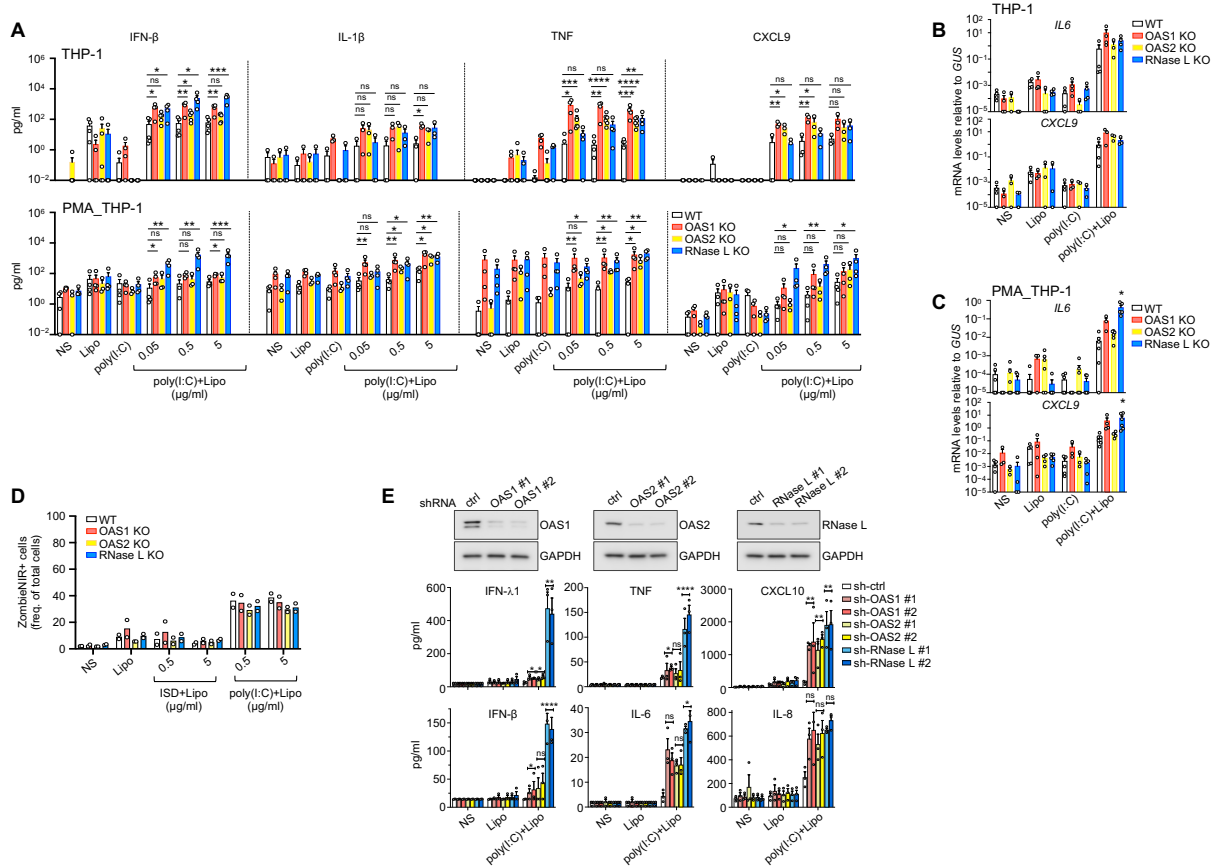

**Fig. S4. Exaggerated inflammatory response of THP-1 cells with OAS–RNase L deficiency**

(A) Concentrations of various cytokines in the supernatant of OAS1 KO, OAS2 KO, RNase L KO, or parental (WT) THP-1 cells (upper panel) or PMA-primed THP-1 cells (lower panel) treated as indicated for 24 hours. The data shown are means  $\pm$  SEM from three to five independent experiments, with one to two technical replicates per experiment. (B to C) *IL6* and *CXCL9* relative mRNA levels as determined by RT-qPCR in OAS1 KO, OAS2 KO, RNase L KO, or parental (WT) THP-1 cells (B) or PMA-primed THP-1 cells (C). The data shown are means  $\pm$  SEM from three to six independent experiments with two technical replicates per experiment. (D) Live–dead staining of THP-1 cells after stimulation with lipofectamine, lipofectamine with control nucleic acid (ISD), or lipofectamine with poly(I:C) in WT parental, OAS1 KO, OAS2 KO, and RNase L KO THP-1 cells. Cells were stained with ZombieNIR after 24 hours of stimulation and acquired by flow cytometry. The data shown are from two independent experiments with two technical replicates per experiment. (E) Concentrations of various cytokines in the supernatant of THP-1 cells transduced with a shRNA targeting *OAS1*, *OAS2*, *RNASEL* (OAS1 KDn, OAS2 KDn, RNase



L KDn), or a scrambled control shRNA (sh-ctrl), treated as indicated. The data shown are means  $\pm$  SEM from three independent experiments with two technical replicates per experiment. At the top, immunoblots of THP-1 cells transduced with shRNA targeting *OAS1*, *OAS2*, *RNASEL* or sh-ctrl. GAPDH was used as a loading control. In (A to C and E), statistical tests were performed as described in the Methods. ns: not significant, \* $P < 0.05$ , \*\* $P < 0.01$ , \*\*\* $P < 0.001$ , \*\*\*\* $P < 0.0001$ . NS: nonstimulated; Lipo: lipofectamine only; poly(I:C): extracellularly added poly(I:C); poly(I:C)+Lipo: intracellular poly(I:C) in the presence of lipofectamine.

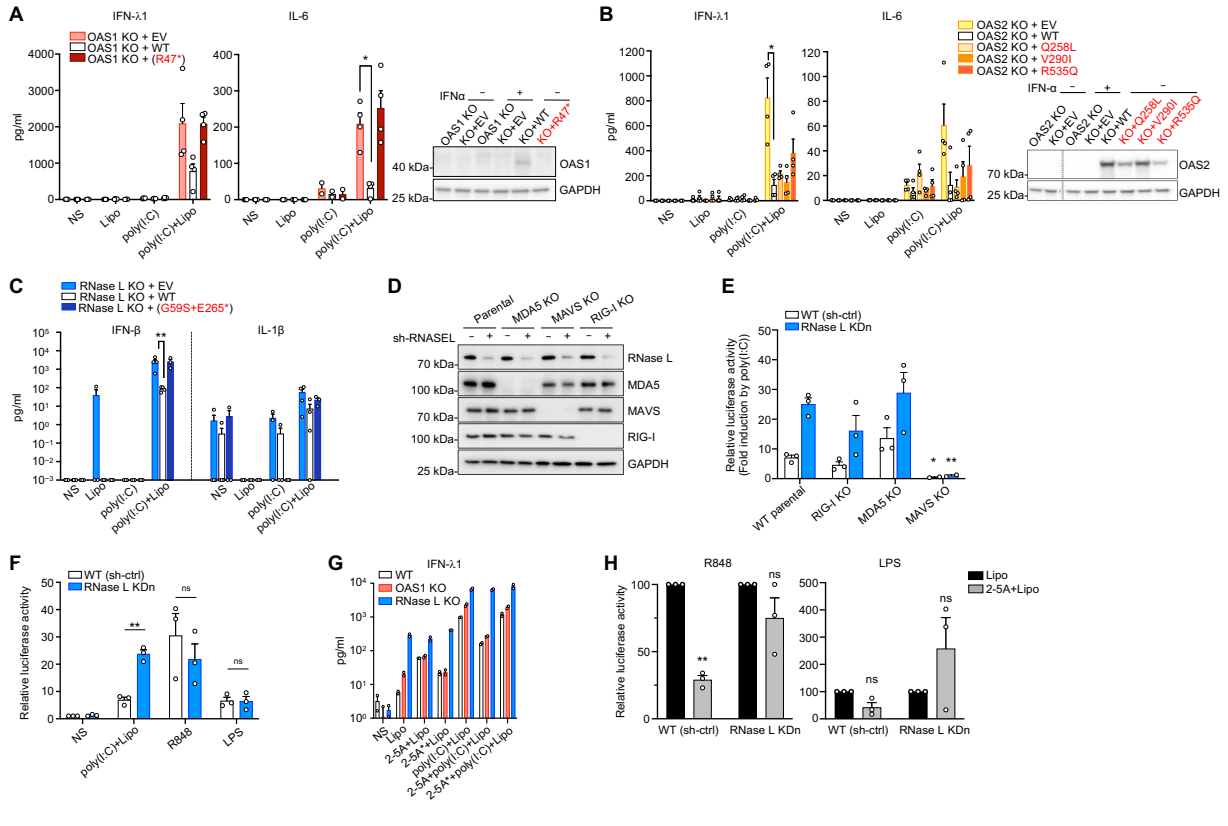

**Fig. S5. Defective activation of the OAS–RNase L pathway results in an exaggerated inflammatory response of THP-1 cells upon intracellular dsRNA stimulation**

(A) IFN- $\lambda$ 1 and IL-6 concentrations in the supernatant of OAS1 KO THP-1 cells transduced with the WT or P1’s variant *OAS1* cDNA (R47\*), or an empty vector (EV), and treated as indicated for 24 hours. The data shown are means  $\pm$  SEM of four biological replicates from two independent experiments. (B) IFN- $\lambda$ 1 and IL-6 concentrations in the supernatant of OAS2 KO THP-1 cells transduced with the WT or the patient-specific variant *OAS2* cDNAs, or an EV, and treated as indicated for 24 hours. The data shown are means  $\pm$  SEM from four biological replicates from two independent experiments. (C) IFN- $\beta$ , IL-1 $\beta$ , and TNF concentrations in the supernatant of RNase L KO THP-1 cells transduced with the WT or P5’s variant *RNASEL* cDNA, or an EV, treated as indicated for 24 hours. The data shown are means  $\pm$  SEM from three to four independent experiments with one to two biological replicates per experiment. (D) Protein levels for RNase L, RIG-I, MDA5, and MAVS as assessed by immunoblotting on WT parental or RIG-I KO, MDA5 KO, or MAVS KO THP-1 cells, with or without RNase L knockdown (KDn). GAPDH was used

as a loading control. **(E)** Relative luciferase activity induced by intracellular poly(I:C) in parental, RIG-I KO, MDA5 KO, or MDA5 KO THP-1 cells expressing an ISRE-luciferase reporter, with or without RNase L KDn. Data are represented as a fold-change relative to cells stimulated with lipofectamine only. The data shown are means  $\pm$  SEM from three independent experiments with two biological replicates per experiment. **(F)** Relative luciferase activity induced by intracellular poly(I:C), R848, or LPS in parental THP-1 cells expressing an ISRE-luciferase reporter, with or without RNase L KDn. Data are represented as activity relative to NS conditions for WT sh-ctrl. The data shown are means  $\pm$  SEM from three independent experiments, with one to two technical replicates per experiment. **(G)** IFN- $\lambda$ 1 and IL-6 concentrations in the supernatant of parental, OAS1 KO, or RNase L KO THP-1 cells treated for 24 hours as indicated. Each data point represents a technical duplicate. **(H)** Relative luciferase activity induced by R848 or LPS in parental THP-1 cells with or without (WT sh-ctrl) RNase L KDn, in the presence of intracellular 2-5A or lipofectamine only. Data are expressed as a percentage of the value in lipofectamine-only conditions. The data shown are means  $\pm$  SEM from three independent experiments with one to two technical replicates per experiment. In **(A to C, E to H)**, statistical tests were performed as described in the Methods. ns: not significant, \* $P < 0.05$ , \*\* $P < 0.01$ . NS: nonstimulated; Lipo: lipofectamine only; poly(I:C): extracellularly added poly(I:C); poly(I:C)+Lipo: intracellular poly(I:C) in the presence of lipofectamine; 2-5A+Lipo: intracellular 2-5A in the presence of lipofectamine; 2-5A\*+Lipo: intracellular dephosphorylated 2-5A in the presence of lipofectamine; 2-5A+poly(I:C)+Lipo or 2-5A\*+poly(I:C)+Lipo: intracellular poly(I:C) in addition to intracellular 2-5A or 2-5A\*.

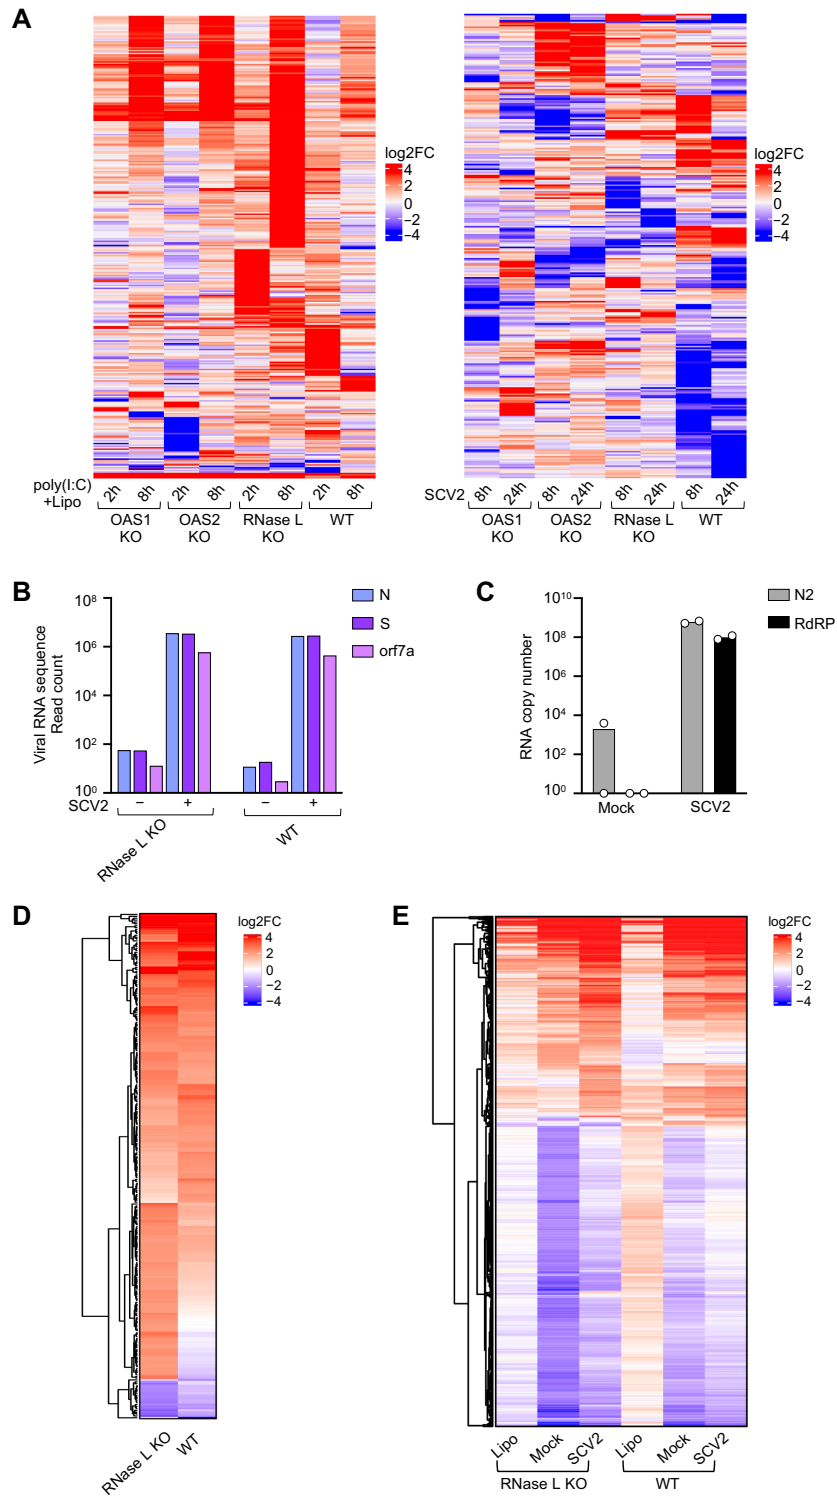

**Fig. S6. Exaggerated inflammatory responses to SARS-CoV-2 in THP-1 cells with OAS–RNase L deficiencies**

(A) Heatmaps of RNAseq-quantified gene induction ( $\log_2FC$ ) relative to nonstimulated conditions for OAS1 KO, OAS2 KO, RNase L KO, and parental THP-1 cells following stimulation with intracellular poly(I:C) for 2 or 8 hours (left), or live SARS-CoV-2 for 8 or 24 hours (right). (B) Detection of SCV2 viral RNA from bulk RNAseq data for total RNA from THP-1 and Vero cell coculture samples, with (SCV2) or without (Mock) SARS-CoV-2 infection for 24 hours. (C) SARS-CoV-2 N2 and RdRP RNA levels as measured by RT-qPCR in Vero cells infected with SARS-CoV-2 or mock-infected for 72 hours. Datapoints are means of technical duplicates. (D) Heatmaps of RNAseq-quantified gene induction ( $\log_2FC$ ) relative to nonstimulated conditions, for RNase L KO and parental (WT) THP-1 cells cocultured for 24 hours with Vero cells infected for 48 hours with SARS-CoV-2 (SCV2) or mock-infected. (E) Heatmaps of RNAseq-quantified gene induction ( $\log_2FC$ ) relative to nonstimulated conditions for RNase L KO and parental (WT) THP-1 cells transfected with total RNA extracted from SARS-CoV-2–infected (SCV2) or mock-infected (Mock) Vero cells, or treated with lipofectamine only (Lipo) for 8 hours.

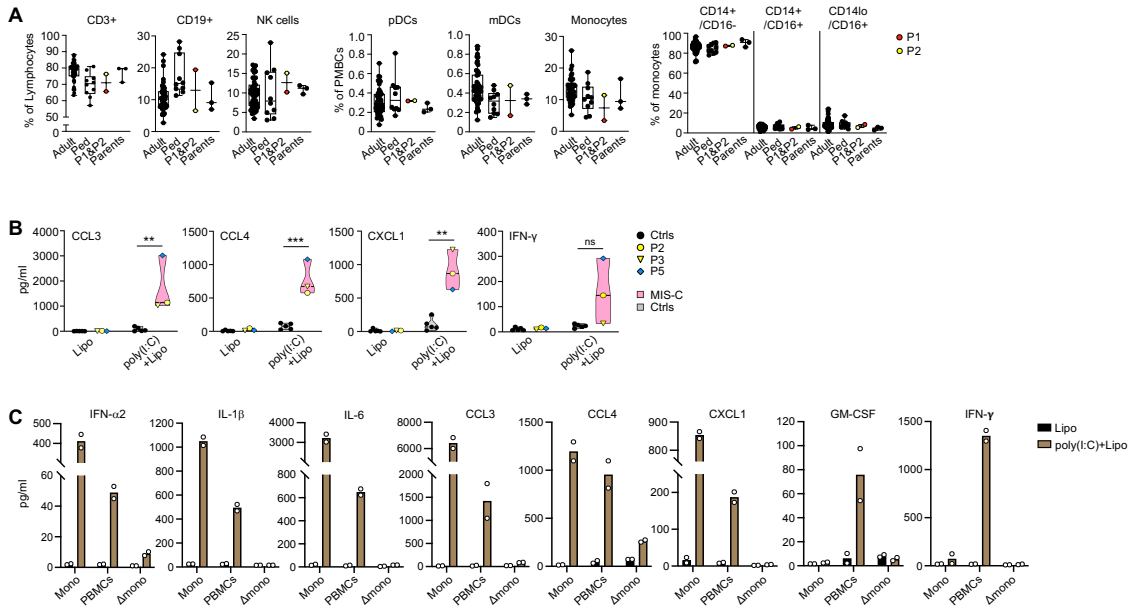

**Fig. S7. Exaggerated myeloid cell activation in response to SARS-CoV-2 underlies MIS-C**

(A) Blood leukocyte subpopulation analysis based on deep immunophenotyping by mass cytometry (CyTOF) for P1 (red) and P2 (yellow) relative to healthy adult (Adult) and pediatric controls (Ped), both parents of P1, and the mother of P2 (Parents). (B) Concentrations of various cytokines in the supernatant of PBMCs from OAS–RNase L-deficient patients (grouped in pink violin zone), and three healthy pediatric and two healthy adult controls (Ctrls) (gray violin zone), treated as indicated for 24 hours. Each data point represents the mean of biological duplicates. Statistical tests were performed to compare the patient group with the control group, as described in the Methods. ns: not significant.  $**P < 0.01$ ,  $***P < 0.001$ . (C) Concentrations of various cytokines in the supernatant of monocytes (Mono), PBMCs, and monocyte-depleted PBMCs ( $\Delta$ mono) from two healthy controls treated as indicated for 24 hours. The data shown are from two independent experiments with two different donors, each tested with duplicates. Each data point represents the mean of biological duplicates for each donor. Lipo: lipofectamine only; poly(I:C)+Lipo: intracellular poly(I:C) in the presence of lipofectamine.

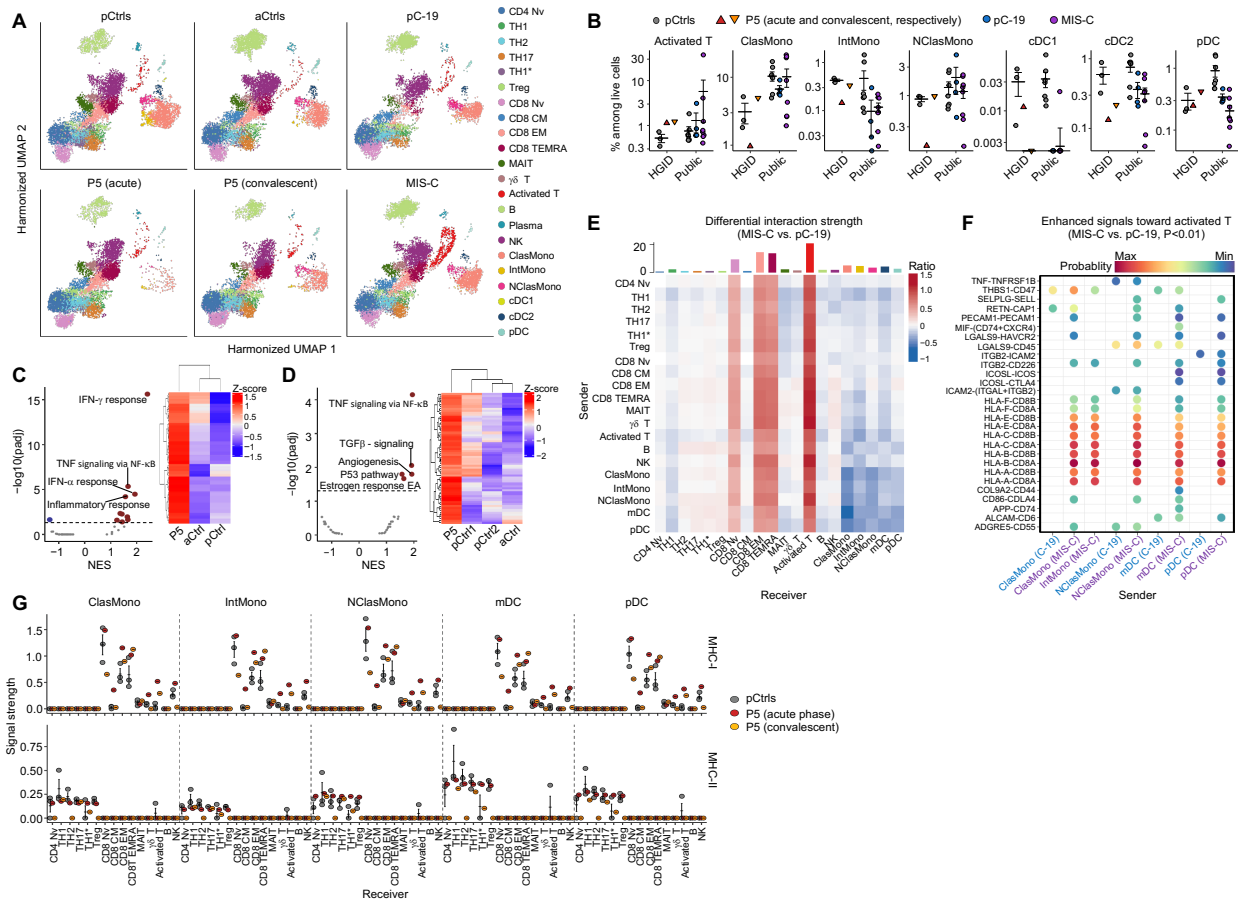

**Fig. S8. Single-cell transcriptome analysis of a patient with MIS-C and inherited RNase L deficiency**

(A to F) scRNAseq of cryopreserved PBMCs from P5 sampled during the acute and convalescent phases; comparison with cells from healthy adult and pediatric controls (aCtrls, pCtrls). A published dataset for pediatric patients with acute SARS-CoV-2 infection (pC-19) or MIS-C was integrated. (A) Cellular composition. After excluding irrelevant cell types, 10,000 cells were randomly sampled from each category for visual comparison. (B) Cell abundance. Data from our laboratory (HGID) are shown separately from the previously published data (Public). (C and D) Differential expression analysis and gene set enrichment analysis (GSEA) for genes with significantly higher or lower levels of expression in P5’s nonclassical monocytes (C) or pDCs (D) sorted from her convalescent phase PBMCs, than in healthy adult and pediatric controls. Volcano plot: immune system-related pathways. NES: normalized enrichment score. Heatmaps: Gene expression (Z-score-scaled  $\log_2$  read counts per million, cpm) for the Hallmark “IFN- $\gamma$  response” gene set. (E and F) Deconvolution of intercellular communications inferred with CellChat,

comparing MIS-C with pediatric acute SARS-CoV-2 infection (pC-19). (G) Signals relating to the MHC-I and MHC-II pathways are derived from myeloid cell subsets and directed toward lymphoid cell subsets.



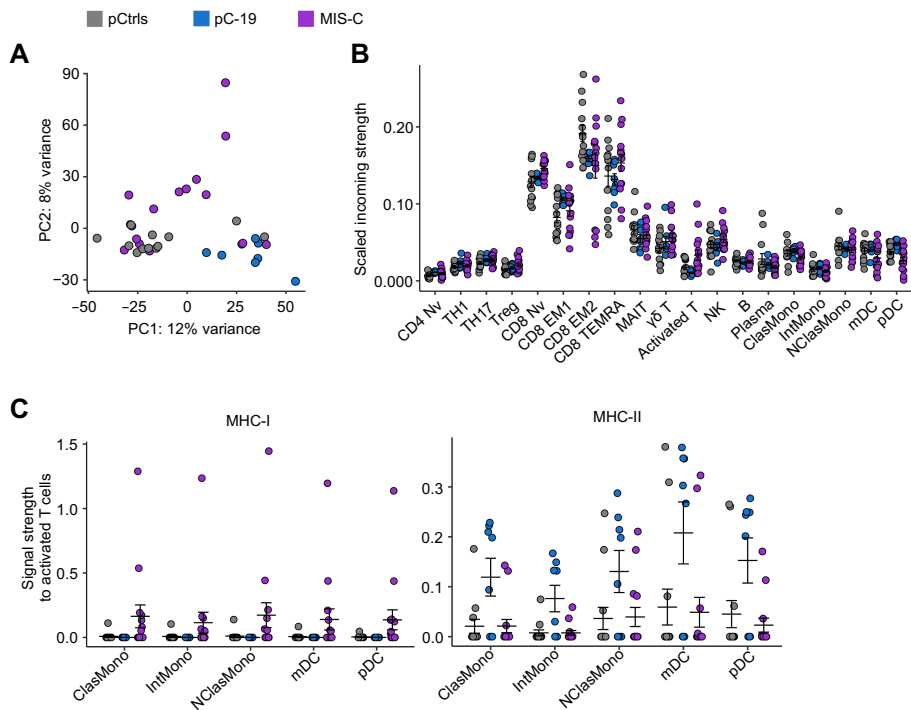

**Fig. S9. Single-cell transcriptome analysis of public datasets for MIS-C patients and controls**

(A to C) Intercellular communication analysis with CellChat was independently repeated with two other sets of scRNAseq data for healthy pediatric controls (pCtrls) and children with acute SARS-CoV-2 infection (pC-19) or MIS-C (GSE166489). (A) PCA plot of all predicted interactions between all sender–receiver pairs of cell subsets. (B) The incoming signal strength for representative cell subsets is shown. (C) Signals relating to the MHC-I and MHC-II pathways are derived from myeloid cell subsets and directed toward activated T cells.

**Table S1.****Nonsynonymous variants of *OAS1*, *OAS2* and *RNASEL* with homozygous carriers reported in the gnomAD database**

| Gene          | Nucleotide change | Amino acid change            | MAF (gnomAD) | Number of homozygotes in gnomAD | CADD_Phred | Exp function |
|---------------|-------------------|------------------------------|--------------|---------------------------------|------------|--------------|
| <i>OAS1</i>   | c.225C>A          | p.Asp75Glu (D75Q)            | 0.000011     | 1                               | 7.19       | LOF          |
| <i>OAS1</i>   | c.217C>T          | p.Arg73* (R73*)              | 0.00005      | 1                               | 32         | LOF          |
| <i>OAS1</i>   | c.315G>C          | p.Gln105His (Q105H)          | 0.000064     | 1                               | 17.58      | Isomorph     |
| <i>OAS1</i>   | c.428A>G          | p.Glu143Gly (E143Q)          | 0.00071      | 1                               | 16.98      | Isomorph     |
| <i>OAS1</i>   | c.349G>A          | p.Val117Met (V117M)          | 0.000131     | 1                               | 21.6       | LOF          |
| <i>OAS1</i>   | c.214G>A          | p.Gly72Ser (G72S)            | 0.000195     | 1                               | 22.3       | Hypomorph    |
| <i>OAS1</i>   | c.760G>A          | p.Gly254Arg (G254R)          | 0.000787     | 2                               | 22.7       | LOF          |
| <i>OAS1</i>   | c.271C>G          | p.Gln91Glu (Q91E)            | 0.001149     | 3                               | 19.16      | LOF          |
| <i>OAS1</i>   | c.725G>A          | p.Arg242Gln (R242Q)          | 0.005707     | 18                              | 0.001      | Isomorph     |
| <i>OAS1</i>   | c.484G>A          | p.Gly162Ser (G162S)          | 0.562148     | 46873                           | 3.09       | Isomorph     |
| <i>OAS2</i>   | c.984A>C          | p.Leu328Phe (L328F)          | 0.0000321    | 1                               | 10.55      | Hypomorph    |
| <i>OAS2</i>   | c.425T>C          | p.Val142Ala (V142A)          | 0.0001676    | 1                               | 15.85      | Isomorph     |
| <i>OAS2</i>   | c.1948C>T         | p.Arg650Cys (R650C)          | 0.0002653    | 1                               | 25.1       | Isomorph     |
| <i>OAS2</i>   | c.1689G>T         | p.L563Phe (L563F)            | 0.0004657    | 2                               | 24.4       | Hypomorph    |
| <i>OAS2</i>   | c.868G>A          | p.Val290Ile (V290I)          | 0.0005153    | 2                               | 5.58       | Hypomorph    |
| <i>RNASEL</i> | c.1778A>G         | p.Tyr593Cys (Y593C)          | 0.0000198    | 1                               | 25.4       | LOF          |
| <i>RNASEL</i> | c.1810G>A         | p.Asp604Asn (D604N)          | 0.0000672    | 1                               | 25.7       | Isomorph     |
| <i>RNASEL</i> | c.1631C>A         | p.Ala544Asp (A544D)          | 0.0000856    | 1                               | 9.91       | Isomorph     |
| <i>RNASEL</i> | c.1469A>G         | p.Asn490Ser (N490S)          | 0.0000916    | 1                               | 25.4       | LOF          |
| <i>RNASEL</i> | c.1059A>G         | p.Ile353Met (I353M)          | 0.0001995    | 1                               | 0.002      | Isomorph     |
| <i>RNASEL</i> | c.1880A>G         | p.Lys627Arg (K627R)          | 0.0004102    | 2                               | 0.001      | Isomorph     |
| <i>RNASEL</i> | c.471_474delAAAG  | p.Lys158ArgfsTer6 (K158Rfs*) | 0.0004459    | 1                               | 32         | LOF          |
| <i>RNASEL</i> | c.1217C>T         | p.Ser406Phe (S406F)          | 0.0009347    | 2                               | 22.6       | Isomorph     |
| <i>RNASEL</i> | c.175G>A          | p.Gly59Ser (G59S)            | 0.0031       | 2                               | 22.9       | Isomorph     |
| <i>RNASEL</i> | c.793G>T          | p.Glu265* (E265*)            | 0.0031       | 2                               | 33         | LOF          |
| <i>RNASEL</i> | c.289A>C          | p.Ile97Leu (I97L)            | 0.0065401    | 14                              | 22.6       | Isomorph     |
| <i>RNASEL</i> | c.1385G>A         | p.Arg462Gln (R462Q)          | 0.3044157    | 14337                           | 16.81      | Isomorph     |
| <i>RNASEL</i> | c.1623T>G         | p.Asp541Glu (D541E)          | 0.5371442    | 41570                           | 0.003      | Isomorph     |

MAF, minor allele frequency.

Exp function, experimental function of each variant as tested in the RNase L-dependent rRNA degradation assay.

**Table S2.**

**Characterization of the patient and control PBMC populations by CyTOF**

| Population                  | Adult controls        | Pediatric controls    | P1 (OAS1-/-) | P2 (OAS2-MT) | Parents              |
|-----------------------------|-----------------------|-----------------------|--------------|--------------|----------------------|
| NK cells/Lymphocytes        | 9.965 (3.43, 17.2)    | 7.93 (3.06, 22.9)     | 10.2         | 15.1         | 11.2 (9.7, 11.9)     |
| CD56bright/NK               | 5.155 (2.18, 17.7)    | 9.17 (2.16, 25.8)     | 6.81         | 3.57         | 4.62 (1.92, 8.91)    |
| CD56dim/NK                  | 94.85 (82.5, 97.8)    | 90.75 (74.2, 97.9)    | 93.1         | 96.4         | 95.4 (90.9, 98)      |
| pDC/PBMCs                   | 0.292 (0.072, 0.706)  | 0.3235 (0.165, 0.81)  | 0.321        | 0.318        | 0.233 (0.204, 0.297) |
| mDC/PBMCs                   | 0.4295 (0.122, 0.883) | 0.317 (0.149, 0.48)   | 0.167        | 0.479        | 0.34 (0.285, 0.389)  |
| Monocytes/PBMCs             | 12.45 (5.17, 25.5)    | 10.4 (4.43, 18.7)     | 3.38         | 11.4         | 9.41 (7.23, 16.6)    |
| CD14+CD16+/Monocytes        | 86.5 (71.3, 96.5)     | 84.15 (78, 90.7)      | 87.1         | 87.9         | 90.9 (86.1, 93.7)    |
| CD14+CD16+/Monocytes        | 5.575 (1.22, 9.12)    | 6.23 (3.78, 11.1)     | 3.88         | 6.27         | 4.13 (3.43, 7.78)    |
| CD14lowCD16+/Monocytes      | 7.055 (1.28, 24.1)    | 8.045 (3.93, 17.4)    | 8.51         | 5.43         | 4.83 (2.88, 5.88)    |
| CD3+/Lymphocytes            | 79.2 (63.3, 88.1)     | 70.4 (57.1, 80.9)     | 65.7         | 76.3         | 79.6 (71.2, 79.7)    |
| Naïve T cells/CD3+          | 35.75 (11.8, 56.9)    | 61 (51.9, 84.4)       | 69.5         | 48.9         | 26.7 (21.2, 39.4)    |
| γδ+/Total naïve T cells     | 0.5305 (0.0269, 2.08) | 1.43 (0.664, 5.21)    | 1.67         | 1.67         | 0.605 (0.439, 0.955) |
| CD4-CD8-/γδ- naïve T cells  | 0.5835 (0.199, 1.49)  | 0.921 (0.541, 1.41)   | 1.76         | 1.01         | 0.98 (0.702, 1.15)   |
| Memory T cells/CD3+         | 65.3 (44.8, 89.3)     | 40 (17.9, 50.3)       | 33.1         | 53.6         | 73 (62.1, 81.2)      |
| γδ+/Total memory T cells    | 7.295 (0.996, 19.4)   | 24.95 (17.5, 35.1)    | 22.3         | 13.2         | 4.73 (4.45, 9.66)    |
| CD4-CD8-/γδ- memory T cells | 1.26 (0.353, 6.69)    | 3.695 (2.02, 4.56)    | 4.34         | 3.15         | 2.11 (1.22, 2.55)    |
| γδ+/CD3+                    | 5.435 (0.67, 14.7)    | 11.35 (3.33, 16.1)    | 6.98         | 8.11         | 3.77 (3.1, 6.73)     |
| γδ-CD4-CD8-/CD3+            | 1.055 (0.33, 4.35)    | 5.27 (0.906, 11.8)    | 2.74         | 23.4         | 2.36 (1.63, 9.98)    |
| CD4+CD8-/CD3+               | 58.95 (41.8, 81.2)    | 55.25 (42.6, 71.5)    | 55.4         | 55.1         | 58.5 (40.3, 62.8)    |
| Th1/Memory CD4 T cells      | 26.05 (14.5, 53.6)    | 22.25 (18.2, 26.5)    | 24           | 26.8         | 20.6 (16.2, 21.7)    |
| Th1*/Memory CD4 T cells     | 25.2 (8.64, 47.6)     | 16.8 (5.48, 28.3)     | 9.29         | 30.2         | 32.4 (29.6, 36.7)    |
| Th17/Memory CD4 T cells     | 10.18 (3.7, 19.2)     | 10.65 (8.1, 18.1)     | 8.36         | 7.59         | 9.49 (7.08, 14.3)    |
| Th2/Memory CD4 T cells      | 7.615 (2.7, 18.1)     | 10.08 (5.26, 16.7)    | 18.1         | 5.01         | 3.62 (3.59, 7.39)    |
| Tfh/Memory CD4 T cells      | 20.15 (11.2, 36.5)    | 23.15 (17.4, 28.6)    | 19.2         | 21.7         | 24 (21.9, 30.7)      |
| Treg/CD4+CD8-               | 6.73 (4.75, 10.9)     | 8.615 (4.64, 9.74)    | 8.02         | 7.26         | 9.37 (6.49, 10.7)    |
| Naïve/CD4+CD8-              | 44.6 (14.8, 68.9)     | 71.25 (54.7, 84.2)    | 85.5         | 54.6         | 39 (22.8, 46.5)      |
| Central memory/CD4+CD8-     | 40.2 (20.4, 67.1)     | 21.7 (13.6, 32.4)     | 9.75         | 32.8         | 49.1 (38.7, 61.9)    |
| Effector memory/CD4+CD8-    | 12.9 (5.44, 33.7)     | 6.835 (1.95, 12.4)    | 3.52         | 11.8         | 13.4 (10.2, 14.2)    |
| TEMRA/CD4+CD8-              | 0.7525 (0.0886, 26.9) | 0.3515 (0.116, 0.638) | 1.19         | 0.74         | 1.42 (1.01, 1.65)    |
| CD4-CD8-/CD3+               | 32.2 (16.5, 46.7)     | 29.65 (18.5, 40.7)    | 33.4         | 33.8         | 35.1 (30.8, 47.9)    |
| Naïve T/CD4-CD8+            | 33.05 (4.77, 67.8)    | 70.6 (51.9, 87.5)     | 54.8         | 44           | 24.2 (19.1, 34.9)    |
| Central memory/CD4-CD8+     | 15.85 (7.06, 40.1)    | 8.16 (4.89, 11.7)     | 3.88         | 13.9         | 17.8 (12.1, 21.3)    |
| Effector memory/CD4-CD8+    | 20.85 (4.16, 51.4)    | 10.67 (2.28, 27.7)    | 5.43         | 21.1         | 21 (19.1, 26.2)      |
| TEMRA/CD4-CD8+              | 28.1 (2.82, 75.6)     | 8.98 (4.77, 19)       | 36           | 21.2         | 38.7 (27, 38.9)      |
| CD19+/Lymphocytes           | 10.2 (2.74, 24.2)     | 15.05 (11.3, 28.2)    | 19.4         | 6.54         | 9.09 (6.97, 15.3)    |
| Naïve B cells/CD19+         | 72.45 (11.3, 85.7)    | 85.25 (66.4, 92.3)    | 89.5         | 67.5         | 69.8 (56.2, 83.1)    |
| Transitional B cells/CD19+  | 3.415 (0.275, 16.1)   | 6.945 (3.76, 30.6)    | 13.7         | 7.02         | 4.43 (2, 13.5)       |
| Memory B cells/CD19+        | 25.95 (11.2, 87.8)    | 13.45 (6.16, 32.9)    | 9.97         | 31.8         | 29.2 (16.2, 43.4)    |
| Plasmablasts/CD19+          | 0.711 (0.143, 4.17)   | 1.395 (0.111, 2.12)   | 0.432        | 0.564        | 0.37 (0.0642, 0.698) |

Note: Values are percentages and presented as median (min, max) unless otherwise specified.  
 Adult controls: n = 48; pediatric controls: n = 10.

**Table S3.****Antibodies used for mass cytometry on fresh whole blood**

| <b>Metal</b> | <b>Target</b> | <b>Titration</b> | <b>Clone</b> | <b>Manufacturer</b>  | <b>Catalog</b> |
|--------------|---------------|------------------|--------------|----------------------|----------------|
| 163Dy        | CXCR3         | 1/800            | G025H7       | Fluidigm             | 3163004B       |
| 152Sm        | TCRgd         | 1/800            | 11F2         | Fluidigm             | 3152008B       |
| 142Nd        | CD19          | 1/400            | HIB19        | Fluidigm             | 3142001B       |
| 144Nd        | CD38          | 1/400            | HIT2         | Fluidigm             | 3144014B       |
| 151Eu        | CD123         | 1/400            | 6H6          | Fluidigm             | 3151001B       |
| 153Eu        | Va7.2         | 1/400            | 3C10         | Fluidigm             | 3153024B       |
| 154Sm        | CD3           | 1/400            | UCHT1        | Fluidigm             | 3154003B       |
| 155Gd        | CD45RA        | 1/400            | HI100        | Fluidigm             | 3155011B       |
| 158Gd        | CD27          | 1/400            | L128         | Fluidigm             | 3158010B       |
| 159Tb        | CD1c          | 1/400            | L161         | Biologend            | 331502         |
| 161Dy        | CLEC9A        | 1/400            | 8F9          | Fluidigm             | 3161018B       |
| 164Dy        | CD161         | 1/400            | HP-3G10      | Fluidigm             | 3164009B       |
| 168Er        | CD8           | 1/400            | SK1          | Fluidigm             | 3168002B       |
| 170Er        | iNKT          | 1/400            | 6B11         | Fluidigm             | 3170015B       |
| 175Lu        | CCR4          | 1/400            | L291H4       | Fluidigm             | 3175035A       |
| 174Yb        | CD4           | 1/400            | RPA-T4       | Biologend            | 300502         |
| 162Dy        | CD21          | 1/400            | REA940       | Miltenyi Biotec Inc. | 130-124-315    |
| 165Ho        | NKG2C         | 1/400            | REA205       | Miltenyi Biotec Inc. | 130-122-278    |
| 148Nd        | CD20          | 1/200            | 2H7          | Biologend            | 302302         |
| 173Yb        | HLA-DR        | 1/200            | L243         | Fluidigm             | 3173005B       |
| 156Gd        | CCR10         | 1/200            | REA326       | Miltenyi Biotec Inc. | 130-122-317    |
| 089Y         | CD45          | 1/200            | HI30         | Fluidigm             | 3089003B       |
| 116Cd        | CD66b         | 1/200            | QA17A51      | Biologend            | 396902         |
| 141Pr        | CCR6          | 1/200            | G034E3       | Fluidigm             | 3141003A       |
| 143Nd        | CD127         | 1/200            | A019D5       | Fluidigm             | 3143012B       |
| 147Sm        | CD11c         | 1/200            | Bu15         | Fluidigm             | 3147008B       |
| 149Sm        | CD25          | 1/200            | 2A3          | Fluidigm             | 3149010B       |
| 150Nd        | NKVFS1        | 1/200            | NKVFS1       | Bio Rad              | MCA2243GA      |
| 167Er        | CCR7          | 1/200            | G043H7       | Fluidigm             | 3167009A       |
| 169Tm        | NKG2A         | 1/200            | Z199         | Fluidigm             | 3169013B       |
| 171Yb        | CXCR5         | 1/200            | RF8B2        | Fluidigm             | 3171014B       |
| 166Er        | CD24          | 1/100            | ML5          | Fluidigm             | 3166007B       |
| 145Nd        | CD31          | 1/100            | WM59         | Fluidigm             | 3145004B       |
| 160Gd        | CD14          | 1/100            | M5E2         | Fluidigm             | 3160001B       |
| 176Yb        | CD56          | 1/100            | NCAM16.2     | Fluidigm             | 3176008B       |
| 172Yb        | CD57          | 1/100            | HNK-1        | Biologend            | 359602         |
| 150Nd        | KIR3DL1L2     | 1/100            | REA970       | Miltenyi Biotec Inc. | 130-126-489    |
| 146Nd        | IgD           | 1/50             | IA6-2        | Fluidigm             | 3146005B       |
| 209Bi        | CD16          | 1/50             | 3G8          | Fluidigm             | 3209002B       |

Titration represents the final dilution of the original antibody used in our experiments.

**Data S1. SARS-CoV-2-induced immune responses across all PBMC cell types**

**Data S2. OAS-RNase L-deficient myeloid cells display enhanced pro-inflammatory responses to SARS-CoV-2**

## References and Notes

1. A. T. Levin, W. P. Hanage, N. Owusu-Boaitey, K. B. Cochran, S. P. Walsh, G. Meyerowitz-Katz, Assessing the age specificity of infection fatality rates for COVID-19: Systematic review, meta-analysis, and public policy implications. *Eur. J. Epidemiol.* **35**, 1123–1138 (2020). [doi:10.1007/s10654-020-00698-1](https://doi.org/10.1007/s10654-020-00698-1) [Medline](#)
2. M. O’Driscoll, G. Ribeiro Dos Santos, L. Wang, D. A. T. Cummings, A. S. Azman, J. Paireau, A. Fontanet, S. Cauchemez, H. Salje, Age-specific mortality and immunity patterns of SARS-CoV-2. *Nature* **590**, 140–145 (2021). [doi:10.1038/s41586-020-2918-0](https://doi.org/10.1038/s41586-020-2918-0) [Medline](#)
3. K. Bhaskaran, S. Bacon, S. J. W. Evans, C. J. Bates, C. T. Rentsch, B. MacKenna, L. Tomlinson, A. J. Walker, A. Schultze, C. E. Morton, D. Grint, A. Mehrkar, R. M. Eggo, P. Inglesby, I. J. Douglas, H. I. McDonald, J. Cockburn, E. J. Williamson, D. Evans, H. J. Curtis, W. J. Hulme, J. Parry, F. Hester, S. Harper, D. Spiegelhalter, L. Smeeth, B. Goldacre, Factors associated with deaths due to COVID-19 versus other causes: Population-based cohort analysis of UK primary care data and linked national death registrations within the OpenSAFELY platform. *Lancet Reg. Health Eur.* **6**, 100109 (2021). [doi:10.1016/j.lanepe.2021.100109](https://doi.org/10.1016/j.lanepe.2021.100109) [Medline](#)
4. E. J. Williamson, A. J. Walker, K. Bhaskaran, S. Bacon, C. Bates, C. E. Morton, H. J. Curtis, A. Mehrkar, D. Evans, P. Inglesby, J. Cockburn, H. I. McDonald, B. MacKenna, L. Tomlinson, I. J. Douglas, C. T. Rentsch, R. Mathur, A. Y. S. Wong, R. Grieve, D. Harrison, H. Forbes, A. Schultze, R. Croker, J. Parry, F. Hester, S. Harper, R. Perera, S. J. W. Evans, L. Smeeth, B. Goldacre, Factors associated with COVID-19-related death using OpenSAFELY. *Nature* **584**, 430–436 (2020). [doi:10.1038/s41586-020-2521-4](https://doi.org/10.1038/s41586-020-2521-4) [Medline](#)
5. Q. Zhang, P. Bastard, Z. Liu, J. Le Pen, M. Moncada-Velez, J. Chen, M. Ogishi, I. K. D. Sabli, S. Hodeib, C. Korol, J. Rosain, K. Bilguvar, J. Ye, A. Bolze, B. Bigio, R. Yang, A. A. Arias, Q. Zhou, Y. Zhang, F. Onodi, S. Korniotis, L. Karpf, Q. Philippot, M. Chbihi, L. Bonnet-Madin, K. Dorgham, N. Smith, W. M. Schneider, B. S. Razoooky, H.-H. Hoffmann, E. Michailidis, L. Moens, J. E. Han, L. Lorenzo, L. Bizien, P. Meade, A.-L. Neehus, A. C. Ugurbil, A. Corneau, G. Kerner, P. Zhang, F. Rapaport, Y. Seeleuthner, J. Manry, C. Masson, Y. Schmitt, A. Schlüter, T. Le Voyer, T. Khan, J. Li, J. Fellay, L. Roussel, M. Shahrooei, M. F. Alosaimi, D. Mansouri, H. Al-Saud, F. Al-Mulla, F. Almourfi, S. Z. Al-Muhsen, F. Alsohime, S. Al Turki, R. Hasanato, D. van de Beek, A. Biondi, L. R. Bettini, M. D’Angio’, P. Bonfanti, L. Imberti, A. Sottini, S. Paghera, E. Quiros-Roldan, C. Rossi, A. J. Oler, M. F. Tompkins, C. Alba, I. Vandernoot, J.-C. Goffard, G. Smits, I. Migeotte, F. Haerynck, P. Soler-Palacin, A. Martin-Nalda, R. Colobran, P.-E. Morange, S. Keles, F. Çölkesen, T. Ozcelik, K. K. Yasar, S. Senoglu, Ş. N. Karabela, C. Rodríguez-Gallego, G. Novelli, S. Hraiech, Y. Tandjaoui-Lambiotte, X. Duval, C. Laouénan, A. L. Snow, C. L. Dalgard, J. D. Milner, D. C. Vinh, T. H. Mogensen, N. Marr, A. N. Spaan, B. Boisson, S. Boisson-Dupuis, J. Bustamante, A. Puel, M. J. Ciancanelli, I. Meyts, T. Maniatis, V. Soumelis, A. Amara, M. Nussenzweig, A. García-Sastre, F. Krammer, A. Pujol, D. Duffy, R. P. Lifton, S.-Y. Zhang, G. Gorochoy, V. Béziat, E. Jouanguy, V. Sancho-Shimizu, C. M. Rice, L. Abel, L. D. Notarangelo, A. Cobat, H. C. Su, J.-L. Casanova; COVID-STORM Clinicians; COVID Clinicians; Imagine COVID Group; French COVID Cohort Study Group; CoV-Contact

Cohort; Amsterdam UMC Covid-19 Biobank; COVID Human Genetic Effort; NIAID-USUHS/TAGC COVID Immunity Group, Inborn errors of type I IFN immunity in patients with life-threatening COVID-19. *Science* **370**, eabd4570 (2020).

[doi:10.1126/science.abd4570](https://doi.org/10.1126/science.abd4570) [Medline](#)

6. P. Bastard, L. B. Rosen, Q. Zhang, E. Michailidis, H.-H. Hoffmann, Y. Zhang, K. Dorgham, Q. Philippot, J. Rosain, V. Béziat, J. Manry, E. Shaw, L. Haljasmägi, P. Peterson, L. Lorenzo, L. Bizien, S. Trouillet-Assant, K. Dobbs, A. A. de Jesus, A. Belot, A. Kallaste, E. Catherinot, Y. Tandjaoui-Lambiotte, J. Le Pen, G. Kerner, B. Bigio, Y. Seeleuthner, R. Yang, A. Bolze, A. N. Spaan, O. M. Delmonte, M. S. Abers, A. Aiuti, G. Casari, V. Lampasona, L. Piemonti, F. Ciceri, K. Bilguvar, R. P. Lifton, M. Vasse, D. M. Smadja, M. Migaud, J. Hadjadj, B. Terrier, D. Duffy, L. Quintana-Murci, D. van de Beek, L. Roussel, D. C. Vinh, S. G. Tangye, F. Haerynck, D. Dalmau, J. Martinez-Picado, P. Brodin, M. C. Nussenzweig, S. Boisson-Dupuis, C. Rodríguez-Gallego, G. Vogt, T. H. Mogensen, A. J. Oler, J. Gu, P. D. Burbelo, J. I. Cohen, A. Biondi, L. R. Bettini, M. D'Angio, P. Bonfanti, P. Rossignol, J. Mayaux, F. Rieux-Laucat, E. S. Husebye, F. Fusco, M. V. Ursini, L. Imberti, A. Sottini, S. Paghera, E. Quiros-Roldan, C. Rossi, R. Castagnoli, D. Montagna, A. Licari, G. L. Marseglia, X. Duval, J. Ghosn, J. S. Tsang, R. Goldbach-Mansky, K. Kisand, M. S. Lionakis, A. Puel, S.-Y. Zhang, S. M. Holland, G. Gorochoy, E. Jouanguy, C. M. Rice, A. Cobat, L. D. Notarangelo, L. Abel, H. C. Su, J.-L. Casanova; HGID Lab; NIAID-USUHS Immune Response to COVID Group; COVID Clinicians; COVID-STORM Clinicians; Imagine COVID Group; French COVID Cohort Study Group; Milieu Intérieur Consortium; CoV-Contact Cohort; Amsterdam UMC Covid-19 Biobank; COVID Human Genetic Effort, Autoantibodies against type I IFNs in patients with life-threatening COVID-19. *Science* **370**, eabd4585 (2020).

[doi:10.1126/science.abd4585](https://doi.org/10.1126/science.abd4585) [Medline](#)

7. T. Asano, B. Boisson, F. Onodi, D. Matuozzo, M. Moncada-Velez, M. R. L. Maglorius Renkilaraj, P. Zhang, L. Meertens, A. Bolze, M. Materna, S. Korniotis, A. Gervais, E. Talouarn, B. Bigio, Y. Seeleuthner, K. Bilguvar, Y. Zhang, A.-L. Neehus, M. Ogishi, S. J. Pelham, T. Le Voyer, J. Rosain, Q. Philippot, P. Soler-Palacín, R. Colobran, A. Martin-Nalda, J. G. Rivière, Y. Tandjaoui-Lambiotte, K. Chaïbi, M. Shahrooei, I. A. Darazam, N. A. Olyaei, D. Mansouri, N. Hatipoğlu, F. Palabiyik, T. Ozcelik, G. Novelli, A. Novelli, G. Casari, A. Aiuti, P. Carrera, S. Bondesan, F. Barzaghi, P. Rovere-Querini, C. Tresoldi, J. L. Franco, J. Rojas, L. F. Reyes, I. G. Bustos, A. A. Arias, G. Morelle, K. Christèle, J. Troya, L. Planas-Serra, A. Schlüter, M. Gut, A. Pujol, L. M. Allende, C. Rodríguez-Gallego, C. Flores, O. Cabrera-Marante, D. E. Pleguezuelo, R. P. de Diego, S. Keles, G. Aytekin, O. M. Akcan, Y. T. Bryceson, P. Bergman, P. Brodin, D. Smole, C. I. E. Smith, A.-C. Norlin, T. M. Campbell, L. E. Covill, L. Hammarström, Q. Pan-Hammarström, H. Abolhassani, S. Mane, N. Marr, M. Ata, F. Al Ali, T. Khan, A. N. Spaan, C. L. Dalgard, P. Bonfanti, A. Biondi, S. Tubiana, C. Burdet, R. Nussbaum, A. Kahn-Kirby, A. L. Snow, J. Bustamante, A. Puel, S. Boisson-Dupuis, S.-Y. Zhang, V. Béziat, R. P. Lifton, P. Bastard, L. D. Notarangelo, L. Abel, H. C. Su, E. Jouanguy, A. Amara, V. Soumelis, A. Cobat, Q. Zhang, J.-L. Casanova; COVID Human Genetic Effort; COVID-STORM Clinicians; COVID Clinicians; Imagine COVID Group; French COVID Cohort Study Group; CoV-Contact Cohort; Amsterdam UMC Covid-; Biobank; NIAID-USUHS COVID Study Group, X-linked recessive TLR7 deficiency in ~1% of

men under 60 years old with life-threatening COVID-19. *Sci. Immunol.* **6**, eabl4348 (2021). [doi:10.1126/sciimmunol.abl4348](https://doi.org/10.1126/sciimmunol.abl4348) [Medline](#)

8. P. Bastard, A. Gervais, T. Le Voyer, J. Rosain, Q. Philippot, J. Manry, E. Michailidis, H.-H. Hoffmann, S. Eto, M. Garcia-Prat, L. Bizien, A. Parra-Martínez, R. Yang, L. Haljasmägi, M. Migaud, K. Särekannu, J. Maslovskaja, N. de Prost, Y. Tandjaoui-Lambiotte, C.-E. Luyt, B. Amador-Borrero, A. Gaudet, J. Poissy, P. Morel, P. Richard, F. Cognasse, J. Troya, S. Trouillet-Assant, A. Belot, K. Saker, P. Garçon, J. G. Rivière, J.-C. Lagier, S. Gentile, L. B. Rosen, E. Shaw, T. Morio, J. Tanaka, D. Dalmau, P.-L. Tharaux, D. Sene, A. Stepanian, B. Megarbane, V. Triantafyllia, A. Fekkar, J. R. Heath, J. L. Franco, J.-M. Anaya, J. Solé-Violán, L. Imberti, A. Biondi, P. Bonfanti, R. Castagnoli, O. M. Delmonte, Y. Zhang, A. L. Snow, S. M. Holland, C. Biggs, M. Moncada-Vélez, A. A. Arias, L. Lorenzo, S. Boucherit, B. Coulibaly, D. Anglicheau, A. M. Planas, F. Haerynck, S. Duvlis, R. L. Nussbaum, T. Ozcelik, S. Keles, A. A. Bousfiha, J. El Bakkouri, C. Ramirez-Santana, S. Paul, Q. Pan-Hammarström, L. Hammarström, A. Dupont, A. Kurolap, C. N. Metz, A. Aiuti, G. Casari, V. Lampasona, F. Ciceri, L. A. Barreiros, E. Dominguez-Garrido, M. Vidigal, M. Zatz, D. van de Beek, S. Sahanic, I. Tancevski, Y. Stepanovskyy, O. Boyarchuk, Y. Nukui, M. Tsumura, L. Vidaur, S. G. Tangye, S. Burrell, D. Duffy, L. Quintana-Murci, A. Klocperk, N. Y. Kann, A. Shcherbina, Y.-L. Lau, D. Leung, M. Coulangeat, J. Marlet, R. Koning, L. F. Reyes, A. Chauvineau-Grenier, F. Venet, G. Monneret, M. C. Nussenzweig, R. Arrestier, I. Boudhabhay, H. Baris-Feldman, D. Hagin, J. Wauters, I. Meyts, A. H. Dyer, S. P. Kennelly, N. M. Bourke, R. Halwani, N. S. Sharif-Askari, K. Dorgham, J. Sallette, S. M. Sedkaoui, S. AlKhatir, R. Rigo-Bonnin, F. Morandeira, L. Roussel, D. C. Vinh, S. R. Ostrowski, A. Condino-Neto, C. Prando, A. Bonradenko, A. N. Spaan, L. Gilardin, J. Fellay, S. Lyonnet, K. Bilguvar, R. P. Lifton, S. Mane, M. S. Anderson, B. Boisson, V. Béziat, S.-Y. Zhang, E. Vandreakos, O. Hermine, A. Pujol, P. Peterson, T. H. Mogensen, L. Rowen, J. Mond, S. Debette, X. de Lamballerie, X. Duval, F. Mentré, M. Zins, P. Soler-Palacin, R. Colobran, G. Gorochov, X. Solanich, S. Susen, J. Martinez-Picado, D. Raoult, M. Vasse, P. K. Gregersen, L. Piemonti, C. Rodríguez-Gallego, L. D. Notarangelo, H. C. Su, K. Kisand, S. Okada, A. Puel, E. Jouanguy, C. M. Rice, P. Tiberghien, Q. Zhang, A. Cobat, L. Abel, J.-L. Casanova; HGID Lab; COVID Clinicians; COVID-STORM Clinicians; NIAID Immune Response to COVID Group; NH-COVAIR Study Group; Danish CHGE; Danish Blood Donor Study; St. James's Hospital; SARS CoV2 Interest group; French COVID Cohort Study Group; Imagine COVID-Group; Milieu Intérieur Consortium; CoV-Contact Cohort; Amsterdam UMC Covid-19; Biobank Investigators; COVID Human Genetic Effort; CONSTANCES cohort; 3C-Dijon Study; Cerba Health-Care; Etablissement du Sang study group, Autoantibodies neutralizing type I IFNs are present in ~4% of uninfected individuals over 70 years old and account for ~20% of COVID-19 deaths. *Sci. Immunol.* **6**, eabl4340 (2021). [doi:10.1126/sciimmunol.abl4340](https://doi.org/10.1126/sciimmunol.abl4340) [Medline](#)
9. Q. Zhang, D. Matuozzo, J. Le Pen, D. Lee, L. Moens, T. Asano, J. Bohlen, Z. Liu, M. Moncada-Velez, Y. Kendir-Demirkol, H. Jing, L. Bizien, A. Marchal, H. Abolhassani, S. Delafontaine, G. Buccioli, G. I. Bayhan, S. Keles, A. Kiykim, S. Hancerli, F. Haerynck, B. Florkin, N. Hatipoglu, T. Ozcelik, G. Morelle, M. Zatz, L. F. P. Ng, D. C. Lye, B. E. Young, Y. S. Leo, C. L. Dalgard, R. P. Lifton, L. Renia, I. Meyts, E. Jouanguy, L. Hammarström, Q. Pan-Hammarström, B. Boisson, P. Bastard, H. C. Su, S. Boisson-Dupuis, L. Abel, C. M. Rice, S. Y. Zhang, A. Cobat, J. L. Casanova; COVID Human



- Genetic Effort, Recessive inborn errors of type I IFN immunity in children with COVID-19 pneumonia. *J. Exp. Med.* **219**, e20220131 (2022). [doi:10.1084/jem.20220131](https://doi.org/10.1084/jem.20220131) [Medline](#)
10. E. Pairo-Castineira, S. Clohisey, L. Klaric, A. D. Bretherick, K. Rawlik, D. Pasko, S. Walker, N. Parkinson, M. H. Fourman, C. D. Russell, J. Furniss, A. Richmond, E. Gountouna, N. Wrobel, D. Harrison, B. Wang, Y. Wu, A. Meynert, F. Griffiths, W. Oosthuyzen, A. Kousathanas, L. Moutsianas, Z. Yang, R. Zhai, C. Zheng, G. Grimes, R. Beale, J. Millar, B. Shih, S. Keating, M. Zechner, C. Haley, D. J. Porteous, C. Hayward, J. Yang, J. Knight, C. Summers, M. Shankar-Hari, P. Klenerman, L. Turtle, A. Ho, S. C. Moore, C. Hinds, P. Horby, A. Nichol, D. Maslove, L. Ling, D. McAuley, H. Montgomery, T. Walsh, A. C. Pereira, A. Renieri, X. Shen, C. P. Ponting, A. Fawkes, A. Tenesa, M. Caulfield, R. Scott, K. Rowan, L. Murphy, P. J. M. Openshaw, M. G. Semple, A. Law, V. Vitart, J. F. Wilson, J. K. Baillie; GenOMICC Investigators; ISARIC4C Investigators; COVID-19 Human Genetics Initiative; 23andMe Investigators; BRACOVID Investigators; Gen-COVID Investigators, Genetic mechanisms of critical illness in COVID-19. *Nature* **591**, 92–98 (2021). [doi:10.1038/s41586-020-03065-y](https://doi.org/10.1038/s41586-020-03065-y) [Medline](#)
  11. H. Zeberg, S. Pääbo, The major genetic risk factor for severe COVID-19 is inherited from Neanderthals. *Nature* **587**, 610–612 (2020). [doi:10.1038/s41586-020-2818-3](https://doi.org/10.1038/s41586-020-2818-3) [Medline](#)
  12. A. Kousathanas, E. Pairo-Castineira, K. Rawlik, A. Stuckey, C. A. Odhams, S. Walker, C. D. Russell, T. Malinauskas, Y. Wu, J. Millar, X. Shen, K. S. Elliott, F. Griffiths, W. Oosthuyzen, K. Morrice, S. Keating, B. Wang, D. Rhodes, L. Klaric, M. Zechner, N. Parkinson, A. Siddiq, P. Goddard, S. Donovan, D. Maslove, A. Nichol, M. G. Semple, T. Zainy, F. Maleady-Crowe, L. Todd, S. Salehi, J. Knight, G. Elgar, G. Chan, P. Arumugam, C. Patch, A. Rendon, D. Bentley, C. Kingsley, J. A. Kosmicki, J. E. Horowitz, A. Baras, G. R. Abecasis, M. A. R. Ferreira, A. Justice, T. Mirshahi, M. Oetjens, D. J. Rader, M. D. Ritchie, A. Verma, T. A. Fowler, M. Shankar-Hari, C. Summers, C. Hinds, P. Horby, L. Ling, D. McAuley, H. Montgomery, P. J. M. Openshaw, P. Elliott, T. Walsh, A. Tenesa, A. Fawkes, L. Murphy, K. Rowan, C. P. Ponting, V. Vitart, J. F. Wilson, J. Yang, A. D. Bretherick, R. H. Scott, S. C. Hendry, L. Moutsianas, A. Law, M. J. Caulfield, J. K. Baillie; GenOMICC investigators; 23andMe investigators; COVID-19 Human Genetics Initiative, Whole-genome sequencing reveals host factors underlying critical COVID-19. *Nature* **607**, 97–103 (2022). [doi:10.1038/s41586-022-04576-6](https://doi.org/10.1038/s41586-022-04576-6) [Medline](#)
  13. COVID-19 Host Genetics Initiative, Mapping the human genetic architecture of COVID-19. *Nature* **600**, 472–477 (2021). [doi:10.1038/s41586-021-03767-x](https://doi.org/10.1038/s41586-021-03767-x) [Medline](#)
  14. S. B. Morris, N. G. Schwartz, P. Patel, L. Abbo, L. Beauchamps, S. Balan, E. H. Lee, R. Paneth-Pollak, A. Geevarughese, M. K. Lash, M. S. Dorsinville, V. Ballen, D. P. Eiras, C. Newton-Cheh, E. Smith, S. Robinson, P. Stogsdill, S. Lim, S. E. Fox, G. Richardson, J. Hand, N. T. Oliver, A. Kofman, B. Bryant, Z. Ende, D. Datta, E. Belay, S. Godfred-Cato, Case series of multisystem inflammatory syndrome in adults associated with SARS-CoV-2 infection — United Kingdom and United States, March–August 2020. *MMWR Morb. Mortal. Wkly. Rep.* **69**, 1450–1456 (2020). [doi:10.15585/mmwr.mm6940e1](https://doi.org/10.15585/mmwr.mm6940e1) [Medline](#)
  15. V. Sancho-Shimizu, P. Brodin, A. Cobat, C. M. Biggs, J. Toubiana, C. L. Lucas, S. E. Henrickson, A. Belot, S. G. Tangye, J. D. Milner, M. Levin, L. Abel, D. Bogunovic, J. L.

- Casanova, S. Y. Zhang; MIS-C@CHGE, SARS-CoV-2-related MIS-C: A key to the viral and genetic causes of Kawasaki disease? *J. Exp. Med.* **218**, e20210446 (2021). [doi:10.1084/jem.20210446](https://doi.org/10.1084/jem.20210446) [Medline](#)
16. E. Whittaker, A. Bamford, J. Kenny, M. Kaforou, C. E. Jones, P. Shah, P. Ramnarayan, A. Fraisse, O. Miller, P. Davies, F. Kucera, J. Brierley, M. McDougall, M. Carter, A. Tremoulet, C. Shimizu, J. Herberg, J. C. Burns, H. Lyall, M. Levin; PIMS-TS Study Group and EUCLIDS and PERFORM Consortia, Clinical characteristics of 58 children with a pediatric inflammatory multisystem syndrome temporally associated with SARS-CoV-2. *JAMA* **324**, 259–269 (2020). [doi:10.1001/jama.2020.10369](https://doi.org/10.1001/jama.2020.10369) [Medline](#)
17. M. Ahmed, S. Advani, A. Moreira, S. Zoretic, J. Martinez, K. Chorath, S. Acosta, R. Naqvi, F. Burmeister-Morton, F. Burmeister, A. Tariela, M. Petershack, M. Evans, A. Hoang, K. Rajasekaran, S. Ahuja, A. Moreira, Multisystem inflammatory syndrome in children: A systematic review. *EClinicalMedicine* **26**, 100527 (2020). [doi:10.1016/j.eclinm.2020.100527](https://doi.org/10.1016/j.eclinm.2020.100527) [Medline](#)
18. E. M. Dufort, E. H. Koumans, E. J. Chow, E. M. Rosenthal, A. Muse, J. Rowlands, M. A. Barranco, A. M. Maxted, E. S. Rosenberg, D. Easton, T. Udo, J. Kumar, W. Pulver, L. Smith, B. Hutton, D. Blog, H. Zucker; New York State and Centers for Disease Control and Prevention Multisystem Inflammatory Syndrome in Children Investigation Team, Multisystem inflammatory syndrome in children in New York State. *N. Engl. J. Med.* **383**, 347–358 (2020). [doi:10.1056/NEJMoa2021756](https://doi.org/10.1056/NEJMoa2021756) [Medline](#)
19. A. B. Payne, Z. Gilani, S. Godfred-Cato, E. D. Belay, L. R. Feldstein, M. M. Patel, A. G. Randolph, M. Newhams, D. Thomas, R. Magleby, K. Hsu, M. Burns, E. Dufort, A. Maxted, M. Pietrowski, A. Longenberger, S. Bidol, J. Henderson, L. Sosa, A. Edmundson, M. Tobin-D'Angelo, L. Edison, S. Heidemann, A. R. Singh, J. S. Giuliano Jr., L. C. Kleinman, K. M. Tarquinio, R. F. Walsh, J. C. Fitzgerald, K. N. Clouser, S. J. Gertz, R. W. Carroll, C. L. Carroll, B. E. Hoots, C. Reed, F. S. Dahlgren, M. E. Oster, T. J. Pierce, A. T. Curns, G. E. Langley, A. P. Campbell, N. Balachandran, T. S. Murray, C. Burkholder, T. Brancard, J. Lifshitz, D. Leach, I. Charpie, C. Tice, S. E. Coffin, D. Perella, K. Jones, K. L. Marohn, P. H. Yager, N. D. Fernandes, H. R. Flori, M. L. Koncicki, K. S. Walker, M. C. Di Pentima, S. Li, S. M. Horwitz, S. Gaur, D. C. Coffey, I. Harwayne-Gidansky, S. R. Hymes, N. J. Thomas, K. G. Ackerman, J. M. Cholette; MIS-C Incidence Authorship Group, Incidence of multisystem inflammatory syndrome in children among US persons infected with SARS-CoV-2. *JAMA Netw. Open* **4**, e2116420 (2021). [doi:10.1001/jamanetworkopen.2021.16420](https://doi.org/10.1001/jamanetworkopen.2021.16420) [Medline](#)
20. L. R. Feldstein, M. W. Tenforde, K. G. Friedman, M. Newhams, E. B. Rose, H. Dapul, V. L. Soma, A. B. Maddux, P. M. Mourani, C. Bowens, M. Maamari, M. W. Hall, B. J. Riggs, J. S. Giuliano Jr., A. R. Singh, S. Li, M. Kong, J. E. Schuster, G. E. McLaughlin, S. P. Schwartz, T. C. Walker, L. L. Loftis, C. V. Hobbs, N. B. Halasa, S. Doymaz, C. J. Babbitt, J. R. Hume, S. J. Gertz, K. Irby, K. N. Clouser, N. Z. Cvijanovich, T. T. Bradford, L. S. Smith, S. M. Heidemann, S. P. Zackai, K. Wellnitz, R. A. Nofziger, S. M. Horwitz, R. W. Carroll, C. M. Rowan, K. M. Tarquinio, E. H. Mack, J. C. Fitzgerald, B. M. Coates, A. M. Jackson, C. C. Young, M. B. F. Son, M. M. Patel, J. W. Newburger, A. G. Randolph; Overcoming COVID-19 Investigators, Characteristics and outcomes of US children and adolescents with multisystem inflammatory syndrome in children (MIS-C)

- compared with severe acute COVID-19. *JAMA* **325**, 1074–1087 (2021). [doi:10.1001/jama.2021.2091](https://doi.org/10.1001/jama.2021.2091) [Medline](#)
21. M. J. Carter, M. Fish, A. Jennings, K. J. Doores, P. Wellman, J. Seow, S. Acors, C. Graham, E. Timms, J. Kenny, S. Neil, M. H. Malim, S. M. Tibby, M. Shankar-Hari, Peripheral immunophenotypes in children with multisystem inflammatory syndrome associated with SARS-CoV-2 infection. *Nat. Med.* **26**, 1701–1707 (2020). [doi:10.1038/s41591-020-1054-6](https://doi.org/10.1038/s41591-020-1054-6) [Medline](#)
  22. C. R. Consiglio, N. Cotugno, F. Sardh, C. Pou, D. Amodio, L. Rodriguez, Z. Tan, S. Zicari, A. Ruggiero, G. R. Pascucci, V. Santilli, T. Campbell, Y. Bryceson, D. Eriksson, J. Wang, A. Marchesi, T. Lakshmikanth, A. Campana, A. Villani, P. Rossi, N. Landegren, P. Palma, P. Brodin; CACTUS Study Team, The immunology of multisystem inflammatory syndrome in children with COVID-19. *Cell* **183**, 968–981.e7 (2020). [doi:10.1016/j.cell.2020.09.016](https://doi.org/10.1016/j.cell.2020.09.016) [Medline](#)
  23. L. Hoste, R. Van Paemel, F. Haerynck, Multisystem inflammatory syndrome in children related to COVID-19: A systematic review. *Eur. J. Pediatr.* **180**, 2019–2034 (2021). [doi:10.1007/s00431-021-03993-5](https://doi.org/10.1007/s00431-021-03993-5) [Medline](#)
  24. J. Toubiana, J. F. Cohen, J. Brice, C. Poirault, F. Bajolle, W. Curtis, F. Moulin, S. Matczak, M. Leruez, J.-L. Casanova, M. Chalumeau, M. Taylor, S. Allali, Distinctive features of Kawasaki disease following SARS-CoV-2 infection: a controlled study in Paris, France. *J. Clin. Immunol.* **41**, 526–535 (2021). [doi:10.1007/s10875-020-00941-0](https://doi.org/10.1007/s10875-020-00941-0) [Medline](#)
  25. B. Cherqaoui, I. Koné-Paut, H. Yager, F. L. Bourgeois, M. Piram, Delineating phenotypes of Kawasaki disease and SARS-CoV-2-related inflammatory multisystem syndrome: A French study and literature review. *Rheumatology* **60**, 4530–4537 (2021). [doi:10.1093/rheumatology/keab026](https://doi.org/10.1093/rheumatology/keab026) [Medline](#)
  26. C. N. Gruber, R. S. Patel, R. Trachtman, L. Lepow, F. Amanat, F. Krammer, K. M. Wilson, K. Onel, D. Geanon, K. Tuballes, M. Patel, K. Mouskas, T. O'Donnell, E. Merritt, N. W. Simons, V. Barcessat, D. M. Del Valle, S. Udondem, G. Kang, S. Gangadharan, G. Ofori-Amanfo, U. Laserson, A. Rahman, S. Kim-Schulze, A. W. Charney, S. Gnjjatic, B. D. Gelb, M. Merad, D. Bogunovic, Mapping systemic inflammation and antibody responses in multisystem inflammatory syndrome in children (MIS-C). *Cell* **183**, 982–995.e14 (2020). [doi:10.1016/j.cell.2020.09.034](https://doi.org/10.1016/j.cell.2020.09.034) [Medline](#)
  27. C. Diorio, S. E. Henrickson, L. A. Vella, K. O. McNerney, J. Chase, C. Burudpakdee, J. H. Lee, C. Jasen, F. Balamuth, D. M. Barrett, B. L. Banwell, K. M. Bernt, A. M. Blatz, K. Chiotos, B. T. Fisher, J. C. Fitzgerald, J. S. Gerber, K. Gollomp, C. Gray, S. A. Grupp, R. M. Harris, T. J. Kilbaugh, A. R. O. John, M. Lambert, E. J. Liebling, M. E. Paessler, W. Petrosa, C. Phillips, A. F. Reilly, N. D. Romberg, A. Seif, D. A. Sesok-Pizzini, K. E. Sullivan, J. Vardaro, E. M. Behrens, D. T. Teachey, H. Bassiri, Multisystem inflammatory syndrome in children and COVID-19 are distinct presentations of SARS-CoV-2. *J. Clin. Invest.* **130**, 5967–5975 (2020). [doi:10.1172/JCI140970](https://doi.org/10.1172/JCI140970) [Medline](#)
  28. P. Y. Lee, M. Day-Lewis, L. A. Henderson, K. G. Friedman, J. Lo, J. E. Roberts, M. S. Lo, C. D. Platt, J. Chou, K. J. Hoyt, A. L. Baker, T. M. Banzon, M. H. Chang, E. Cohen, S. D. de Ferranti, A. Dionne, S. Habiballah, O. Halyabar, J. S. Hausmann, M. M. Hazen, E. Janssen, E. Meidan, R. W. Nelson, A. A. Nguyen, R. P. Sundel, F. Dedeoglu, P. A.

- Nigrovic, J. W. Newburger, M. B. F. Son, Distinct clinical and immunological features of SARS-CoV-2-induced multisystem inflammatory syndrome in children. *J. Clin. Invest.* **130**, 5942–5950 (2020). [doi:10.1172/JCI141113](https://doi.org/10.1172/JCI141113) [Medline](#)
29. A. Esteve-Sole, J. Anton, R. M. Pino-Ramirez, J. Sanchez-Manubens, V. Fumadó, C. Fortuny, M. Rios-Barnes, J. Sanchez-de-Toledo, M. Girona-Alarcón, J. M. Mosquera, S. Ricart, C. Launes, M. F. de Sevilla, C. Jou, C. Muñoz-Almagro, E. González-Roca, A. Vergara, J. Carrillo, M. Juan, D. Cuadras, A. Noguera-Julian, I. Jordan, L. Alsina, Similarities and differences between the immunopathogenesis of COVID-19-related pediatric multisystem inflammatory syndrome and Kawasaki disease. *J. Clin. Invest.* **131**, e144554 (2021). [doi:10.1172/JCI144554](https://doi.org/10.1172/JCI144554) [Medline](#)
30. H. Bukulmez, Current understanding of multisystem inflammatory syndrome (MIS-C) following COVID-19 and its distinction from Kawasaki disease. *Curr. Rheumatol. Rep.* **23**, 58 (2021). [doi:10.1007/s11926-021-01028-4](https://doi.org/10.1007/s11926-021-01028-4) [Medline](#)
31. L. A. Vella, J. R. Giles, A. E. Baxter, D. A. Oldridge, C. Diorio, L. Kuri-Cervantes, C. Alanio, M. B. Pampena, J. E. Wu, Z. Chen, Y. J. Huang, E. M. Anderson, S. Gouma, K. O. McNerney, J. Chase, C. Burudpakdee, J. H. Lee, S. A. Apostolidis, A. C. Huang, D. Mathew, O. Kuthuru, E. C. Goodwin, M. E. Weirick, M. J. Bolton, C. P. Arevalo, A. Ramos, C. J. Jasen, P. E. Conrey, S. Sayed, H. M. Giannini, K. D'Andrea, N. J. Meyer, E. M. Behrens, H. Bassiri, S. E. Hensley, S. E. Henrickson, D. T. Teachey, M. R. Betts, E. J. Wherry; UPenn COVID Processing Unit, Deep immune profiling of MIS-C demonstrates marked but transient immune activation compared to adult and pediatric COVID-19. *Sci. Immunol.* **6**, eabf7570 (2021). [doi:10.1126/sciimmunol.abf7570](https://doi.org/10.1126/sciimmunol.abf7570) [Medline](#)
32. M. Moreews, K. Le Gouge, S. Khaldi-Plassart, R. Pescarmona, A.-L. Mathieu, C. Malcus, S. Djebali, A. Bellomo, O. Dauwalder, M. Perret, M. Villard, E. Chopin, I. Rouvet, F. Vandenesch, C. Dupieux, R. Pouyau, S. Teysse, M. Guerder, T. Louazon, A. Moulin-Zinsch, M. Duperril, H. Patural, L. Giovannini-Chami, A. Portefaix, B. Kassai, F. Venet, G. Monneret, C. Lombard, H. Flodrops, J.-M. De Guillebon, F. Bajolle, V. Launay, P. Bastard, S.-Y. Zhang, V. Dubois, O. Thauinat, J.-C. Richard, M. Mezidi, O. Allatif, K. Saker, M. Dreux, L. Abel, J.-L. Casanova, J. Marvel, S. Trouillet-Assant, D. Klatzmann, T. Walzer, E. Mariotti-Ferrandiz, E. Javouhey, A. Belot, Polyclonal expansion of TCR V $\beta$  21.3<sup>+</sup> CD4<sup>+</sup> and CD8<sup>+</sup> T cells is a hallmark of multisystem inflammatory syndrome in children. *Sci. Immunol.* **6**, eabh1516 (2021). [doi:10.1126/sciimmunol.abh1516](https://doi.org/10.1126/sciimmunol.abh1516) [Medline](#)
33. C. de Cevins, M. Luka, N. Smith, S. Meynier, A. Magérus, F. Carbone, V. García-Paredes, L. Barnabei, M. Batignes, A. Boullé, M. C. Stolzenberg, B. P. Pérot, B. Charbit, T. Fali, V. Pirabakaran, B. Sorin, Q. Riller, G. Abdessalem, M. Beretta, L. Grzelak, P. Goncalves, J. P. Di Santo, H. Mouquet, O. Schwartz, M. Zarhrate, M. Parisot, C. Bole-Feysot, C. Masson, N. Cagnard, A. Corneau, C. Brunaud, S. Y. Zhang, J. L. Casanova, B. Bader-Meunier, J. Haroche, I. Melki, M. Lorrot, M. Oualha, F. Moulin, D. Bonnet, Z. Belhadjer, M. Leruez, S. Allali, C. Gras-Leguen, L. de Pontual, A. Fischer, D. Duffy, F. Rieux-Laucat, J. Toubiana, M. M. Ménager; Pediatric-Biocovid Study Group, A monocyte/dendritic cell molecular signature of SARS-CoV-2-related multisystem inflammatory syndrome in children with severe myocarditis. *Med (N Y)* **2**, 1072–1092.e7 (2021). [doi:10.1016/j.medj.2021.08.002](https://doi.org/10.1016/j.medj.2021.08.002) [Medline](#)

34. A. Ramaswamy, N. N. Brodsky, T. S. Sumida, M. Comi, H. Asashima, K. B. Hoehn, N. Li, Y. Liu, A. Shah, N. G. Ravindra, J. Bishai, A. Khan, W. Lau, B. Sellers, N. Bansal, P. Guerrero, A. Unterman, V. Habet, A. J. Rice, J. Catanzaro, H. Chandnani, M. Lopez, N. Kaminski, C. S. Dela Cruz, J. S. Tsang, Z. Wang, X. Yan, S. H. Kleinstein, D. van Dijk, R. W. Pierce, D. A. Hafler, C. L. Lucas, Immune dysregulation and autoreactivity correlate with disease severity in SARS-CoV-2-associated multisystem inflammatory syndrome in children. *Immunity* **54**, 1083–1095.e7 (2021). [doi:10.1016/j.immuni.2021.04.003](https://doi.org/10.1016/j.immuni.2021.04.003) [Medline](#)
35. L. A. Vella, A. H. Rowley, Current insights into the pathophysiology of multisystem inflammatory syndrome in children. *Curr. Pediatr. Rep.* **9**, 83–92 (2021). [doi:10.1007/s40124-021-00257-6](https://doi.org/10.1007/s40124-021-00257-6) [Medline](#)
36. K. Sacco, R. Castagnoli, S. Vakkilainen, C. Liu, O. M. Delmonte, C. Oguz, I. M. Kaplan, S. Alehashemi, P. D. Burbelo, F. Bhuyan, A. A. de Jesus, K. Dobbs, L. B. Rosen, A. Cheng, E. Shaw, M. S. Vakkilainen, F. Pala, J. Lack, Y. Zhang, D. L. Fink, V. Oikonomou, A. L. Snow, C. L. Dalgard, J. Chen, B. A. Sellers, G. A. Montealegre Sanchez, K. Barron, E. Rey-Jurado, C. Vial, M. C. Poli, A. Licari, D. Montagna, G. L. Marseglia, F. Licciardi, U. Ramenghi, V. Discepolo, A. Lo Vecchio, A. Guarino, E. M. Eisenstein, L. Imberti, A. Sottini, A. Biondi, S. Mató, D. Gerstbacher, M. Truong, M. A. Stack, M. Magliocco, M. Bosticardo, T. Kawai, J. J. Danielson, T. Hulett, M. Askenazi, S. Hu, J. I. Cohen, H. C. Su, D. B. Kuhns, M. S. Lionakis, T. M. Snyder, S. M. Holland, R. Goldbach-Mansky, J. S. Tsang, L. D. Notarangelo; NIAID Immune Response to COVID Group; Chile MIS-C Group; Pavia Pediatric COVID-19 Group, Immunopathological signatures in multisystem inflammatory syndrome in children and pediatric COVID-19. *Nat. Med.* **28**, 1050–1062 (2022). [doi:10.1038/s41591-022-01724-3](https://doi.org/10.1038/s41591-022-01724-3) [Medline](#)
37. R. A. Porritt, L. Paschold, M. N. Rivas, M. H. Cheng, L. M. Yonker, H. Chandnani, M. Lopez, D. Simnica, C. Schultheiß, C. Santiskulvong, J. Van Eyk, J. K. McCormick, A. Fasano, I. Bahar, M. Binder, M. Arditì, HLA class I-associated expansion of TRBV11-2 T cells in multisystem inflammatory syndrome in children. *J. Clin. Invest.* **131**, e146614 (2021). [doi:10.1172/JCI146614](https://doi.org/10.1172/JCI146614) [Medline](#)
38. L. Hoste, L. Roels, L. Naesens, V. Bosteels, S. Vanhee, S. Dupont, C. Bosteels, R. Browaeys, N. Vandamme, K. Verstaen, J. Roels, K. F. A. Van Damme, B. Maes, E. De Leeuw, J. Declercq, H. Aegerter, L. Seys, U. Smole, S. De Prijck, M. Vanheerswyngheles, K. Claes, V. Debacker, G. Van Isterdael, L. Backers, K. B. M. Claes, P. Bastard, E. Jouanguy, S.-Y. Zhang, G. Mets, J. Dehoorne, K. Vandekerckhove, P. Schelstraete, J. Willems, P. Stordeur, S. Janssens, R. Beyaert, Y. Saeys, J. L. Casanova, B. N. Lambrecht, F. Haerynck, S. J. Tavernier; MIS-C Clinicians, TIM3<sup>+</sup>TRBV11-2 T cells and IFN $\gamma$  signature in patrolling monocytes and CD16<sup>+</sup> NK cells delineate MIS-C. *J. Exp. Med.* **219**, e20211381 (2022). [doi:10.1084/jem.20211381](https://doi.org/10.1084/jem.20211381) [Medline](#)
39. J. L. Casanova, L. Abel, Mechanisms of viral inflammation and disease in humans. *Science* **374**, 1080–1086 (2021). [doi:10.1126/science.abj7965](https://doi.org/10.1126/science.abj7965) [Medline](#)
40. S. Y. Zhang, Q. Zhang, J. L. Casanova, H. C. Su; COVID Team, Severe COVID-19 in the young and healthy: Monogenic inborn errors of immunity? *Nat. Rev. Immunol.* **20**, 455–456 (2020). [doi:10.1038/s41577-020-0373-7](https://doi.org/10.1038/s41577-020-0373-7) [Medline](#)

41. Y. Itan, L. Shang, B. Boisson, E. Patin, A. Bolze, M. Moncada-Vélez, E. Scott, M. J. Ciancanelli, F. G. Lafaille, J. G. Markle, R. Martinez-Barricarte, S. J. de Jong, X.-F. Kong, P. Nitschke, A. Belkadi, J. Bustamante, A. Puel, S. Boisson-Dupuis, P. D. Stenson, J. G. Gleeson, D. N. Cooper, L. Quintana-Murci, J.-M. Claverie, S.-Y. Zhang, L. Abel, J.-L. Casanova, The human gene damage index as a gene-level approach to prioritizing exome variants. *Proc. Natl. Acad. Sci. U.S.A.* **112**, 13615–13620 (2015). [doi:10.1073/pnas.1518646112](https://doi.org/10.1073/pnas.1518646112) [Medline](#)
42. S. L. Schwartz, G. L. Conn, RNA regulation of the antiviral protein 2'-5'-oligoadenylate synthetase. *Wiley Interdiscip. Rev. RNA* **10**, e1534 (2019). [doi:10.1002/wrna.1534](https://doi.org/10.1002/wrna.1534) [Medline](#)
43. B. Dong, R. H. Silverman, 2-5A-dependent RNase molecules dimerize during activation by 2-5A. *J. Biol. Chem.* **270**, 4133–4137 (1995). [doi:10.1074/jbc.270.8.4133](https://doi.org/10.1074/jbc.270.8.4133) [Medline](#)
44. M. Uhlén, L. Fagerberg, B. M. Hallström, C. Lindskog, P. Oksvold, A. Mardinoglu, Å. Sivertsson, C. Kampf, E. Sjöstedt, A. Asplund, I. Olsson, K. Edlund, E. Lundberg, S. Navani, C. A.-K. Szigartyo, J. Odeberg, D. Djureinovic, J. O. Takanen, S. Hober, T. Alm, P.-H. Edqvist, H. Berling, H. Tegel, J. Mulder, J. Rockberg, P. Nilsson, J. M. Schwenk, M. Hamsten, K. von Feilitzen, M. Forsberg, L. Persson, F. Johansson, M. Zwahlen, G. von Heijne, J. Nielsen, F. Pontén, Tissue-based map of the human proteome. *Science* **347**, 1260419 (2015). [doi:10.1126/science.1260419](https://doi.org/10.1126/science.1260419) [Medline](#)
45. L. Zhao, L. D. Birdwell, A. Wu, R. Elliott, K. M. Rose, J. M. Phillips, Y. Li, J. Grinspan, R. H. Silverman, S. R. Weiss, Cell-type-specific activation of the oligoadenylate synthetase–RNase L pathway by a murine coronavirus. *J. Virol.* **87**, 8408–8418 (2013). [doi:10.1128/JVI.00769-13](https://doi.org/10.1128/JVI.00769-13) [Medline](#)
46. S. Banerjee, A. Chakrabarti, B. K. Jha, S. R. Weiss, R. H. Silverman, Cell-type-specific effects of RNase L on viral induction of beta interferon. *mBio* **5**, e00856-14 (2014). [doi:10.1128/mBio.00856-14](https://doi.org/10.1128/mBio.00856-14) [Medline](#)
47. F. Rapaport, B. Boisson, A. Gregor, V. Béziat, S. Boisson-Dupuis, J. Bustamante, E. Jouanguy, A. Puel, J. Rosain, Q. Zhang, S.-Y. Zhang, J. G. Gleeson, L. Quintana-Murci, J.-L. Casanova, L. Abel, E. Patin, Negative selection on human genes underlying inborn errors depends on disease outcome and both the mode and mechanism of inheritance. *Proc. Natl. Acad. Sci. U.S.A.* **118**, e2001248118 (2021). [doi:10.1073/pnas.2001248118](https://doi.org/10.1073/pnas.2001248118) [Medline](#)
48. B. Dong, M. Niwa, P. Walter, R. H. Silverman, Basis for regulated RNA cleavage by functional analysis of RNase L and Ire1p. *RNA* **7**, 361–373 (2001). [doi:10.1017/S1355838201002230](https://doi.org/10.1017/S1355838201002230) [Medline](#)
49. R. H. Silverman, J. J. Skehel, T. C. James, D. H. Wreschner, I. M. Kerr, rRNA cleavage as an index of ppp(A2'p)<sub>n</sub>A activity in interferon-treated encephalomyocarditis virus-infected cells. *J. Virol.* **46**, 1051–1055 (1983). [doi:10.1128/jvi.46.3.1051-1055.1983](https://doi.org/10.1128/jvi.46.3.1051-1055.1983) [Medline](#)
50. D. H. Wreschner, T. C. James, R. H. Silverman, I. M. Kerr, Ribosomal RNA cleavage, nuclease activation and 2-5A (ppp(A2'p)<sub>n</sub>A) in interferon-treated cells. *Nucleic Acids Res.* **9**, 1571–1581 (1981). [doi:10.1093/nar/9.7.1571](https://doi.org/10.1093/nar/9.7.1571) [Medline](#)

51. Y. Xiang, Z. Wang, J. Murakami, S. Plummer, E. A. Klein, J. D. Carpten, J. M. Trent, W. B. Isaacs, G. Casey, R. H. Silverman, Effects of RNase L mutations associated with prostate cancer on apoptosis induced by 2',5'-oligoadenylates. *Cancer Res.* **63**, 6795–6801 (2003). [Medline](#)
52. L. A. Henderson, S. W. Canna, K. G. Friedman, M. Gorelik, S. K. Lapidus, H. Bassiri, E. M. Behrens, K. F. Kernan, G. S. Schulert, P. Seo, M. B. F. Son, A. H. Tremoulet, C. VanderPluym, R. S. M. Yeung, A. S. Mudano, A. S. Turner, D. R. Karp, J. J. Mehta, American College of Rheumatology clinical guidance for multisystem inflammatory syndrome in children associated with SARS-CoV-2 and hyperinflammation in pediatric COVID-19: version 3. *Arthritis Rheumatol.* **74**, e1–e20 (2022). [doi:10.1002/art.42062](https://doi.org/10.1002/art.42062) [Medline](#)
53. A. Wickenhagen, E. Sugrue, S. Lytras, S. Kuchi, M. Noerenberg, M. L. Turnbull, C. Loney, V. Herder, J. Allan, I. Jarmsen, N. Cameron-Ruiz, M. Varjak, R. M. Pinto, J. Y. Lee, L. Iselin, N. Palmalux, D. G. Stewart, S. Swingler, E. J. D. Greenwood, T. W. M. Crozier, Q. Gu, E. L. Davies, S. Clohisey, B. Wang, F. Trindade Maranhão Costa, M. Freire Santana, L. C. de Lima Ferreira, L. Murphy, A. Fawkes, A. Meynert, G. Grimes, J. L. Da Silva Filho, M. Marti, J. Hughes, R. J. Stanton, E. C. Y. Wang, A. Ho, I. Davis, R. F. Jarrett, A. Castello, D. L. Robertson, M. G. Semple, P. J. M. Openshaw, M. Palmarini, P. J. Lehner, J. K. Baillie, S. J. Rihn, S. J. Wilson; ISARIC4C Investigators, A prenylated dsRNA sensor protects against severe COVID-19. *Science* **374**, eabj3624 (2021). [doi:10.1126/science.abj3624](https://doi.org/10.1126/science.abj3624) [Medline](#)
54. O. Danziger, R. S. Patel, E. J. DeGrace, M. R. Rosen, B. R. Rosenberg, Inducible CRISPR activation screen for interferon-stimulated genes identifies OAS1 as a SARS-CoV-2 restriction factor. *PLOS Pathog.* **18**, e1010464 (2022). [doi:10.1371/journal.ppat.1010464](https://doi.org/10.1371/journal.ppat.1010464) [Medline](#)
55. Y. Li, D. M. Renner, C. E. Comar, J. N. Whelan, H. M. Reyes, F. L. Cardenas-Diaz, R. Truitt, L. H. Tan, B. Dong, K. D. Alysandratos, J. Huang, J. N. Palmer, N. D. Adappa, M. A. Kohanski, D. N. Kotton, R. H. Silverman, W. Yang, E. E. Morrissey, N. A. Cohen, S. R. Weiss, SARS-CoV-2 induces double-stranded RNA-mediated innate immune responses in respiratory epithelial-derived cells and cardiomyocytes. *Proc. Natl. Acad. Sci. U.S.A.* **118**, e2022643118 (2021). [doi:10.1073/pnas.2022643118](https://doi.org/10.1073/pnas.2022643118) [Medline](#)
56. P. Bastard, J. Manry, J. Chen, J. Rosain, Y. Seeleuthner, O. AbuZaitun, L. Lorenzo, T. Khan, M. Hasek, N. Hernandez, B. Bigio, P. Zhang, R. Lévy, S. Shrot, E. J. G. Reino, Y.-S. Lee, S. Boucherit, M. Aubart, R. Gijssbers, V. Béziat, Z. Li, S. Pellegrini, F. Rozenberg, N. Marr, I. Meyts, B. Boisson, A. Cobat, J. Bustamante, Q. Zhang, E. Jouangy, L. Abel, R. Somech, J.-L. Casanova, S.-Y. Zhang, Herpes simplex encephalitis in a patient with a distinctive form of inherited IFNAR1 deficiency. *J. Clin. Invest.* **131**, e139980 (2021). [doi:10.1172/JCI139980](https://doi.org/10.1172/JCI139980) [Medline](#)
57. X. Song, W. Hu, H. Yu, L. Zhao, Y. Zhao, X. Zhao, H.-H. Xue, Y. Zhao, Little to no expression of angiotensin-converting enzyme-2 on most human peripheral blood immune cells but highly expressed on tissue macrophages. *Cytometry A* 10.1002/cyto.a.24285 (2020). [doi:10.1002/cyto.a.24285](https://doi.org/10.1002/cyto.a.24285) [Medline](#)

58. T. S. Rodrigues, K. S. G. de Sá, A. Y. Ishimoto, A. Becerra, S. Oliveira, L. Almeida, A. V. Gonçalves, D. B. Perucello, W. A. Andrade, R. Castro, F. P. Veras, J. E. Toller-Kawahisa, D. C. Nascimento, M. H. F. de Lima, C. M. S. Silva, D. B. Caetite, R. B. Martins, I. A. Castro, M. C. Pontelli, F. C. de Barros, N. B. do Amaral, M. C. Giannini, L. P. Bonjorno, M. I. F. Lopes, R. C. Santana, F. C. Vilar, M. Auxiliadora-Martins, R. Luppino-Assad, S. C. L. de Almeida, F. R. de Oliveira, S. S. Batah, L. Siyuan, M. N. Benatti, T. M. Cunha, J. C. Alves-Filho, F. Q. Cunha, L. D. Cunha, F. G. Frantz, T. Kohlsdorf, A. T. Fabro, E. Arruda, R. D. R. de Oliveira, P. Louzada-Junior, D. S. Zamboni, Inflammasomes are activated in response to SARS-CoV-2 infection and are associated with COVID-19 severity in patients. *J. Exp. Med.* **218**, e20201707 (2021). [doi:10.1084/jem.20201707](https://doi.org/10.1084/jem.20201707) [Medline](#)
59. J. Zheng, Y. Wang, K. Li, D. K. Meyerholz, C. Allamargot, S. Perlman, Severe acute respiratory syndrome coronavirus 2–induced immune activation and death of monocyte-derived human macrophages and dendritic cells. *J. Infect. Dis.* **223**, 785–795 (2021). [doi:10.1093/infdis/jiaa753](https://doi.org/10.1093/infdis/jiaa753) [Medline](#)
60. I. Gresser, F. Vignaux, F. Belardelli, M. G. Tovey, M. T. Maunoury, Injection of mice with antibody to mouse interferon alpha/beta decreases the level of 2'-5' oligoadenylate synthetase in peritoneal macrophages. *J. Virol.* **53**, 221–227 (1985). [doi:10.1128/jvi.53.1.221-227.1985](https://doi.org/10.1128/jvi.53.1.221-227.1985) [Medline](#)
61. W. Chanput, J. J. Mes, H. J. Wichers, THP-1 cell line: An in vitro cell model for immune modulation approach. *Int. Immunopharmacol.* **23**, 37–45 (2014). [doi:10.1016/j.intimp.2014.08.002](https://doi.org/10.1016/j.intimp.2014.08.002) [Medline](#)
62. W. B. Lee, W. Y. Choi, D.-H. Lee, H. Shim, J. Kim-Ha, Y.-J. Kim, OAS1 and OAS3 negatively regulate the expression of chemokines and interferon-responsive genes in human macrophages. *BMB Rep.* **52**, 133–138 (2019). [doi:10.5483/BMBRep.2019.52.2.129](https://doi.org/10.5483/BMBRep.2019.52.2.129) [Medline](#)
63. T. Kawai, S. Akira, Innate immune recognition of viral infection. *Nat. Immunol.* **7**, 131–137 (2006). [doi:10.1038/ni1303](https://doi.org/10.1038/ni1303) [Medline](#)
64. A. Chakrabarti, B. K. Jha, R. H. Silverman, New insights into the role of RNase L in innate immunity. *J. Interferon Cytokine Res.* **31**, 49–57 (2011). [doi:10.1089/jir.2010.0120](https://doi.org/10.1089/jir.2010.0120) [Medline](#)
65. A. G. Hovanessian, J. Wood, E. Meurs, L. Montagnier, Increased nuclease activity in cells treated with pppA2'p5'A2'p5' A. *Proc. Natl. Acad. Sci. U.S.A.* **76**, 3261–3265 (1979). [doi:10.1073/pnas.76.7.3261](https://doi.org/10.1073/pnas.76.7.3261) [Medline](#)
66. A. Zhou, B. A. Hassel, R. H. Silverman, Expression cloning of 2-5A-dependent RNAase: A uniquely regulated mediator of interferon action. *Cell* **72**, 753–765 (1993). [doi:10.1016/0092-8674\(93\)90403-D](https://doi.org/10.1016/0092-8674(93)90403-D) [Medline](#)
67. K. Malathi, J. M. Paranjape, E. Bulanova, M. Shim, J. M. Guenther-Johnson, P. W. Faber, T. E. Eling, B. R. G. Williams, R. H. Silverman, A transcriptional signaling pathway in the IFN system mediated by 2'-5'-oligoadenylate activation of RNase L. *Proc. Natl. Acad. Sci. U.S.A.* **102**, 14533–14538 (2005). [doi:10.1073/pnas.0507551102](https://doi.org/10.1073/pnas.0507551102) [Medline](#)



68. J. M. Burke, S. L. Moon, T. Matheny, R. Parker, RNase L reprograms translation by widespread mRNA turnover escaped by antiviral mRNAs. *Mol. Cell* **75**, 1203–1217.e5 (2019). [doi:10.1016/j.molcel.2019.07.029](https://doi.org/10.1016/j.molcel.2019.07.029) [Medline](#)
69. M. Knight, P. J. Cayley, R. H. Silverman, D. H. Wreschner, C. S. Gilbert, R. E. Brown, I. M. Kerr, Radioimmune, radiobinding and HPLC analysis of 2-5A and related oligonucleotides from intact cells. *Nature* **288**, 189–192 (1980). [doi:10.1038/288189a0](https://doi.org/10.1038/288189a0) [Medline](#)
70. A. Asthana, C. Gaughan, B. Dong, S. R. Weiss, R. H. Silverman, Specificity and mechanism of coronavirus, rotavirus, and mammalian two-histidine phosphoesterases that antagonize antiviral innate immunity. *mBio* **12**, e0178121 (2021). [doi:10.1128/mBio.01781-21](https://doi.org/10.1128/mBio.01781-21) [Medline](#)
71. A. Liberzon, C. Birger, H. Thorvaldsdóttir, M. Ghandi, J. P. Mesirov, P. Tamayo, The Molecular Signatures Database (MSigDB) hallmark gene set collection. *Cell Syst.* **1**, 417–425 (2015). [doi:10.1016/j.cels.2015.12.004](https://doi.org/10.1016/j.cels.2015.12.004) [Medline](#)
72. E. J. Mendoza, K. Manguiat, H. Wood, M. Drebot, Two detailed plaque assay protocols for the quantification of infectious SARS-CoV-2. *Curr. Protoc. Microbiol.* **57**, ecpmc105 (2020). [doi:10.1002/cpmc.105](https://doi.org/10.1002/cpmc.105) [Medline](#)
73. A. C. G. Salina, D. Dos-Santos, T. S. Rodrigues, M. Fortes-Rocha, E. G. Freitas-Filho, D. L. Alzamora-Terrel, I. M. S. Castro, T. F. C. Fraga da Silva, M. H. F. de Lima, D. C. Nascimento, C. M. Silva, J. E. Toller-Kawahisa, A. Becerra, S. Oliveira, D. B. Caetité, L. Almeida, A. Y. Ishimoto, T. M. Lima, R. B. Martins, F. Veras, N. B. do Amaral, M. C. Giannini, L. P. Bonjorno, M. I. F. Lopes, M. N. Benatti, S. S. Batah, R. C. Santana, F. C. Vilar, M. A. Martins, R. L. Assad, S. C. L. de Almeida, F. R. de Oliveira, E. Arruda Neto, T. M. Cunha, J. C. Alves-Filho, V. L. D. Bonato, F. Q. Cunha, A. T. Fabro, H. I. Nakaya, D. S. Zamboni, P. Louzada-Junior, R. D. R. Oliveira, L. D. Cunha, Efferocytosis of SARS-CoV-2-infected dying cells impairs macrophage anti-inflammatory functions and clearance of apoptotic cells. *eLife* **11**, e74443 (2022). [doi:10.7554/eLife.74443](https://doi.org/10.7554/eLife.74443) [Medline](#)
74. S. Jin, C. F. Guerrero-Juarez, L. Zhang, I. Chang, R. Ramos, C.-H. Kuan, P. Myung, M. V. Plikus, Q. Nie, Inference and analysis of cell-cell communication using CellChat. *Nat. Commun.* **12**, 1088 (2021). [doi:10.1038/s41467-021-21246-9](https://doi.org/10.1038/s41467-021-21246-9) [Medline](#)
75. A. Chakrabarti, S. Banerjee, L. Franchi, Y.-M. Loo, M. Gale Jr., G. Núñez, R. H. Silverman, RNase L activates the NLRP3 inflammasome during viral infections. *Cell Host Microbe* **17**, 466–477 (2015). [doi:10.1016/j.chom.2015.02.010](https://doi.org/10.1016/j.chom.2015.02.010) [Medline](#)
76. N. Magusali, A. C. Graham, T. M. Piers, P. Panichnantakul, U. Yaman, M. Shoai, R. H. Reynolds, J. A. Botia, K. J. Brookes, T. Guetta-Baranes, E. Bellou, S. Bayram, D. Sokolova, M. Ryten, C. Sala Frigerio, V. Escott-Price, K. Morgan, J. M. Pocock, J. Hardy, D. A. Salih, A genetic link between risk for Alzheimer’s disease and severe COVID-19 outcomes via the *OAS1* gene. *Brain* **144**, 3727–3741 (2021). [doi:10.1093/brain/awab337](https://doi.org/10.1093/brain/awab337) [Medline](#)
77. S. Zhou, G. Butler-Laporte, T. Nakanishi, D. R. Morrison, J. Afilalo, M. Afilalo, L. Laurent, M. Pietzner, N. Kerrison, K. Zhao, E. Brunet-Ratnasingham, D. Henry, N. Kimchi, Z. Afrasiabi, N. Rezk, M. Bouab, L. Petitjean, C. Guzman, X. Xue, C. Tselios, B.

- Vulesevic, O. Adeleye, T. Abdullah, N. Almamlouk, Y. Chen, M. Chassé, M. Durand, C. Paterson, J. Normark, R. Frithiof, M. Lipcsey, M. Hultström, C. M. T. Greenwood, H. Zeberg, C. Langenberg, E. Thysell, M. Pollak, V. Mooser, V. Forgetta, D. E. Kaufmann, J. B. Richards, A Neanderthal OAS1 isoform protects individuals of European ancestry against COVID-19 susceptibility and severity. *Nat. Med.* **27**, 659–667 (2021). [doi:10.1038/s41591-021-01281-1](https://doi.org/10.1038/s41591-021-01281-1) [Medline](#)
78. H. Zeberg, S. Pääbo, A genomic region associated with protection against severe COVID-19 is inherited from Neandertals. *Proc. Natl. Acad. Sci. U.S.A.* **118**, e2026309118 (2021). [doi:10.1073/pnas.2026309118](https://doi.org/10.1073/pnas.2026309118) [Medline](#)
79. J. E. Huffman, G. Butler-Laporte, A. Khan, E. Pairo-Castineira, T. G. Drivas, G. M. Peloso, T. Nakanishi, A. Ganna, A. Verma, J. K. Baillie, K. Kiryluk, J. B. Richards, H. Zeberg; COVID-19 Host Genetics Initiative, Multi-ancestry fine mapping implicates *OAS1* splicing in risk of severe COVID-19. *Nat. Genet.* **54**, 125–127 (2022). [doi:10.1038/s41588-021-00996-8](https://doi.org/10.1038/s41588-021-00996-8) [Medline](#)
80. K. Cho, M. Yamada, K. Agematsu, H. Kanegane, N. Miyake, M. Ueki, T. Akimoto, N. Kobayashi, S. Ikemoto, M. Tanino, A. Fujita, I. Hayasaka, S. Miyamoto, M. Tanaka-Kubota, K. Nakata, M. Shiina, K. Ogata, H. Minakami, N. Matsumoto, T. Ariga, Heterozygous mutations in *OAS1* cause infantile-onset pulmonary alveolar proteinosis with hypogammaglobulinemia. *Am. J. Hum. Genet.* **102**, 480–486 (2018). [doi:10.1016/j.ajhg.2018.01.019](https://doi.org/10.1016/j.ajhg.2018.01.019) [Medline](#)
81. T. Magg, T. Okano, L. M. Koenig, D. F. R. Boehmer, S. L. Schwartz, K. Inoue, J. Heimall, F. Licciardi, J. Ley-Zaporozhan, R. M. Ferdman, A. Caballero-Oteyza, E. N. Park, B. M. Calderon, D. Dey, H. Kanegane, K. Cho, D. Montin, K. Reiter, M. Griese, M. H. Albert, M. Rohlf, P. Gray, C. Walz, G. L. Conn, K. E. Sullivan, C. Klein, T. Morio, F. Hauck, Heterozygous *OAS1* gain-of-function variants cause an autoinflammatory immunodeficiency. *Sci. Immunol.* **6**, eabf9564 (2021). [doi:10.1126/sciimmunol.abf9564](https://doi.org/10.1126/sciimmunol.abf9564) [Medline](#)
82. A. G. Hovanessian, R. E. Brown, I. M. Kerr, Synthesis of low molecular weight inhibitor of protein synthesis with enzyme from interferon-treated cells. *Nature* **268**, 537–540 (1977). [doi:10.1038/268537a0](https://doi.org/10.1038/268537a0) [Medline](#)
83. I. M. Kerr, R. E. Brown, pppA2'p5'A2'p5'A: an inhibitor of protein synthesis synthesized with an enzyme fraction from interferon-treated cells. *Proc. Natl. Acad. Sci. U.S.A.* **75**, 256–260 (1978). [doi:10.1073/pnas.75.1.256](https://doi.org/10.1073/pnas.75.1.256) [Medline](#)
84. M. Drappier, T. Michiels, Inhibition of the OAS/RNase L pathway by viruses. *Curr. Opin. Virol.* **15**, 19–26 (2015). [doi:10.1016/j.coviro.2015.07.002](https://doi.org/10.1016/j.coviro.2015.07.002) [Medline](#)
85. R. H. Silverman, Viral encounters with 2',5'-oligoadenylate synthetase and RNase L during the interferon antiviral response. *J. Virol.* **81**, 12720–12729 (2007). [doi:10.1128/JVI.01471-07](https://doi.org/10.1128/JVI.01471-07) [Medline](#)
86. R. J. Lin, H.-P. Yu, B.-L. Chang, W.-C. Tang, C.-L. Liao, Y.-L. Lin, Distinct antiviral roles for human 2',5'-oligoadenylate synthetase family members against dengue virus infection. *J. Immunol.* **183**, 8035–8043 (2009). [doi:10.4049/jimmunol.0902728](https://doi.org/10.4049/jimmunol.0902728) [Medline](#)

87. Y. C. Kwon, J. I. Kang, S. B. Hwang, B. Y. Ahn, The ribonuclease L-dependent antiviral roles of human 2',5'-oligoadenylate synthetase family members against hepatitis C virus. *FEBS Lett.* **587**, 156–164 (2013). [doi:10.1016/j.febslet.2012.11.010](https://doi.org/10.1016/j.febslet.2012.11.010) [Medline](#)
88. Y. Li, S. Banerjee, Y. Wang, S. A. Goldstein, B. Dong, C. Gaughan, R. H. Silverman, S. R. Weiss, Activation of RNase L is dependent on OAS3 expression during infection with diverse human viruses. *Proc. Natl. Acad. Sci. U.S.A.* **113**, 2241–2246 (2016). [doi:10.1073/pnas.1519657113](https://doi.org/10.1073/pnas.1519657113) [Medline](#)
89. J. N. Whelan, Y. Li, R. H. Silverman, S. R. Weiss, Zika virus production is resistant to RNase L antiviral activity. *J. Virol.* **93**, e00313-19 (2019). [doi:10.1128/JVI.00313-19](https://doi.org/10.1128/JVI.00313-19) [Medline](#)
90. C. S. Thakur, Z. Xu, Z. Wang, Z. Novince, R. H. Silverman, A convenient and sensitive fluorescence resonance energy transfer assay for RNase L and 2',5' oligoadenylates. *Methods Mol. Med.* **116**, 103–113 (2005). [doi:10.1385/1-59259-939-7:103](https://doi.org/10.1385/1-59259-939-7:103) [Medline](#)
91. K. Sacco, R. Castagnoli, S. Vakkilainen, C. Liu, O. M. Delmonte, C. Oguz, I. M. Kaplan, S. Alehashemi, P. D. Burbelo, F. Bhuyan, A. A. de Jesus, K. Dobbs, L. B. Rosen, A. Cheng, E. Shaw, M. S. Vakkilainen, F. Pala, J. Lack, Y. Zhang, D. L. Fink, V. Oikonomou, A. L. Snow, C. L. Dalgard, J. Chen, B. A. Sellers, G. A. Montealegre Sanchez, K. Barron, E. Rey, C. Vial, M. C. Poli, A. Licari, D. Montagna, G. L. Marseglia, F. Licciardi, U. Ramenghi, V. Discepolo, A. L. Vecchio, A. Guarino, E. M. Eisenstein, L. Imberti, A. Sottini, A. Biondi, S. Mató, D. Gertsbacher, M. Truong, M. A. Stack, M. Magliocco, M. Bosticardo, T. Kawai, J. J. Danielson, T. Hulett, M. Askenazi, J. I. Cohen, H. C. Su, D. B. Kuhns, M. S. Lionakis, T. M. Snyder, S. M. Holland, R. Goldbach-Mansky, J. S. Tsang, L. D. Notarangelo; NIH, NIAID Immune Response to COVID Group; Chile MIS-C Group; Pavia Pediatric COVID-19 Group, Multiomics approach identifies novel age-, time- and treatment-related immunopathological signatures in MIS-C and pediatric COVID-19, version 1.0.0, Zenodo (2021); <https://doi.org/10.5281/zenodo.5524378>.
92. M. A. DePristo, E. Banks, R. Poplin, K. V. Garimella, J. R. Maguire, C. Hartl, A. A. Philippakis, G. del Angel, M. A. Rivas, M. Hanna, A. McKenna, T. J. Fennell, A. M. Kernytsky, A. Y. Sivachenko, K. Cibulskis, S. B. Gabriel, D. Altshuler, M. J. Daly, A framework for variation discovery and genotyping using next-generation DNA sequencing data. *Nat. Genet.* **43**, 491–498 (2011). [doi:10.1038/ng.806](https://doi.org/10.1038/ng.806) [Medline](#)
93. H. Li, R. Durbin, Fast and accurate short read alignment with Burrows–Wheeler transform. *Bioinformatics* **25**, 1754–1760 (2009). [doi:10.1093/bioinformatics/btp324](https://doi.org/10.1093/bioinformatics/btp324) [Medline](#)
94. W. McLaren, L. Gil, S. E. Hunt, H. S. Riat, G. R. S. Ritchie, A. Thormann, P. Flicek, F. Cunningham, The Ensembl Variant Effect Predictor. *Genome Biol.* **17**, 122 (2016). [doi:10.1186/s13059-016-0974-4](https://doi.org/10.1186/s13059-016-0974-4) [Medline](#)
95. N. Hernandez, I. Melki, H. Jing, T. Habib, S. S. Y. Huang, J. Danielson, T. Kula, S. Drutman, S. Belkaya, V. Rattina, L. Lorenzo-Diaz, A. Boulai, Y. Rose, N. Kitabayashi, M. P. Rodero, C. Dumaine, S. Blanche, M.-N. Lebras, M. C. Leung, L. S. Mathew, B. Boisson, S.-Y. Zhang, S. Boisson-Dupuis, S. Giliani, D. Chaussabel, L. D. Notarangelo, S. J. Elledge, M. J. Ciancanelli, L. Abel, Q. Zhang, N. Marr, Y. J. Crow, H. C. Su, J.-L. Casanova, Life-threatening influenza pneumonitis in a child with inherited IRF9 deficiency. *J. Exp. Med.* **215**, 2567–2585 (2018). [doi:10.1084/jem.20180628](https://doi.org/10.1084/jem.20180628) [Medline](#)

96. I. Korsunsky, N. Millard, J. Fan, K. Slowikowski, F. Zhang, K. Wei, Y. Baglaenko, M. Brenner, P. R. Loh, S. Raychaudhuri, Fast, sensitive and accurate integration of single-cell data with Harmony. *Nat. Methods* **16**, 1289–1296 (2019). [doi:10.1038/s41592-019-0619-0](https://doi.org/10.1038/s41592-019-0619-0) [Medline](#)
97. D. Aran, A. P. Looney, L. Liu, E. Wu, V. Fong, A. Hsu, S. Chak, R. P. Naikawadi, P. J. Wolters, A. R. Abate, A. J. Butte, M. Bhattacharya, Reference-based analysis of lung single-cell sequencing reveals a transitional profibrotic macrophage. *Nat. Immunol.* **20**, 163–172 (2019). [doi:10.1038/s41590-018-0276-y](https://doi.org/10.1038/s41590-018-0276-y) [Medline](#)
98. G. Monaco, B. Lee, W. Xu, S. Mustafah, Y. Y. Hwang, C. Carré, N. Burdin, L. Visan, M. Ceccarelli, M. Poidinger, A. Zippelius, J. Pedro de Magalhães, A. Larbi, RNA-seq signatures normalized by mRNA abundance allow absolute deconvolution of human immune cell types. *Cell Rep.* **26**, 1627–1640.e7 (2019). [doi:10.1016/j.celrep.2019.01.041](https://doi.org/10.1016/j.celrep.2019.01.041) [Medline](#)
99. M. I. Love, W. Huber, S. Anders, Moderated estimation of fold change and dispersion for RNA-seq data with DESeq2. *Genome Biol.* **15**, 550 (2014). [doi:10.1186/s13059-014-0550-8](https://doi.org/10.1186/s13059-014-0550-8) [Medline](#)
100. R. C. Team, R: A Language and Environment for Statistical Computing (R Foundation for Statistical Computing, 2018); <https://www.R-project.org/>.
